# Supplementary material
Source: ML conference proceedings conference paper supplement (https://proceedings.neurips.cc/paper_files/paper/2020/hash/7ec0dbeee45813422897e04ad8424a5e-Abstract.html)
Supplement: Supplementary file [file 7ec0dbeee45813422897e04ad8424a5e-Supplemental.pdf]

35 The first step is to decompose eq. (1) into three terms, corresponding to the prior  $P_0$ , the channel  
 36  $P_{\text{out}}$ , and the “delta” term. Note that the matrix  $\Phi$  only appears in the last “delta” term. By left and  
 37 right orthogonal (resp. unitary) invariance of  $\Phi$ , the quantity

$$\mathbb{E}_{\Phi} \left[ \prod_{a=0}^p \delta \left( \mathbf{z}^a - \frac{1}{\sqrt{n}} \Phi \mathbf{x}^a \right) \right]$$

38 is determined by the value of the *overlaps*  $\mathbf{Q}^z \equiv \{(\mathbf{z}^a)^\dagger \mathbf{z}^b / m\}_{a,b=0}^p$  and  $\mathbf{Q}^x \equiv \{(\mathbf{x}^a)^\dagger \mathbf{x}^b / n\}_{a,b=0}^p$ ,  
 39 which are positive symmetric (Hermitian in the complex case) matrices. As is standard in such replica  
 40 calculations, we will constraint the terms in eq. (1) by the value of these overlaps, before performing  
 41 a Laplace method on the resulting function of the overlaps. By  $A_n \simeq B_n$ , we will mean equivalence  
 42 at leading exponential order, that is  $(\ln A_n)/n = (\ln B_n)/n + \mathcal{O}_n(1)$ . We introduce in eq. (1) the  
 43 term:

$$1 \simeq \int \prod_{0 \leq a \leq b \leq p} dQ_{ab}^x dQ_{ab}^z \left[ \prod_{a \leq b} \delta(nQ_{ab}^x - (\mathbf{x}^a)^\dagger \mathbf{x}^b) \right] \left[ \prod_{a \leq b} \delta(mQ_{ab}^z - (\mathbf{z}^a)^\dagger \mathbf{z}^b) \right].$$

44 We can use a Fourier transformation of the delta terms, which allows in the end to transform eq.(1)  
 45 into the product of three independent terms. Performing the saddle-point on  $\mathbf{Q}^x, \mathbf{Q}^z$ , we obtain the  
 46 corresponding result:

$$\lim_{n \rightarrow \infty} \frac{1}{n} \ln \mathbb{E}_{\mathbf{Y}, \Phi} [\mathcal{Z}_n(\mathbf{Y})^p] = \sup_{\mathbf{Q}^x, \mathbf{Q}^z} [I_0(p, \mathbf{Q}^x) + \alpha I_{\text{out}}(p, \mathbf{Q}^z) + I_{\text{int}}(p, \mathbf{Q}^x, \mathbf{Q}^z)],$$

47 in which the supremum is made over positive symmetric (Hermitian) matrices, and  $I_0, I_{\text{out}}$  and  $I_{\text{int}}$   
 48 are functions whose calculation will be detailed below.

#### 49 A.2.1 The prior term $I_0(p, \mathbf{Q}^x)$

50 We have by the Laplace method after Fourier transformation of the delta terms:

$$\begin{aligned} I_0(p, \mathbf{Q}^x) &\simeq \frac{1}{n} \ln \int \prod_{0 \leq a \leq b \leq p} d\hat{Q}_{ab}^x \int_{\mathbb{K}} \prod_{a=0}^p \prod_{i=1}^n P_0(dx_i^a) e^{-\frac{\beta}{2} \sum_{a,b=0}^p \hat{Q}_{ab}^x (\sum_i x_i^a x_i^b - nQ_{ab}^x)}, \\ &\simeq \inf_{\hat{\mathbf{Q}}^x} \left[ \frac{\beta}{2} \sum_{a,b} Q_{ab}^x \hat{Q}_{ab}^x + \ln \int_{\mathbb{K}} \prod_{a=0}^p P_0(dx^a) e^{-\frac{\beta}{2} \sum_{a,b} \hat{Q}_{ab}^x \overline{x^a x^b}} \right]. \end{aligned}$$

51 The infimum is again over positive symmetric (Hermitian) matrices. We also made use of the fact that  
 52 the prior  $P_0$  is i.i.d. over the elements of  $\mathbf{x}$ . A very important assumption of our calculation is replica  
 53 symmetry. It amounts to assume that all the  $(p+1)$  replicas are equivalent, and that this symmetry  
 54 is not broken by the system at the solution of the Laplace method. Replica symmetry and replica  
 55 symmetry breaking are a very rich field of study in statistical physics [5]. It has been argued that for  
 56 an inference problem in the Bayes-optimal setting (as is the present case), replica symmetry is never  
 57 broken [6]. We can therefore assume a replica symmetric form of  $\mathbf{Q}^x, \hat{\mathbf{Q}}^x$  at the point at which the  
 58 saddle point is reached, that we write as:

$$\mathbf{Q}^x = \begin{pmatrix} Q_x & q_x & \cdots & q_x \\ q_x & Q_x & \cdots & q_x \\ \vdots & \vdots & \ddots & \vdots \\ q_x & q_x & \cdots & Q_x \end{pmatrix}, \quad \hat{\mathbf{Q}}^x = \begin{pmatrix} \hat{Q}_x & -\hat{q}_x & \cdots & -\hat{q}_x \\ -\hat{q}_x & \hat{Q}_x & \cdots & -\hat{q}_x \\ \vdots & \vdots & \ddots & \vdots \\ -\hat{q}_x & -\hat{q}_x & \cdots & \hat{Q}_x \end{pmatrix}. \quad (2)$$

59 Note that for  $\beta \in \{1, 2\}$ , we have  $Q_x, q_x, \hat{Q}_x, \hat{q}_x \in \mathbb{R}$ . After a simple Gaussian transformation of the  
 60 squared term using the general identity for  $x \in \mathbb{K}$ :

$$\exp\left(\frac{\beta}{2}|x|^2\right) = \int_{\mathbb{K}} \mathcal{D}_\beta \xi \exp(\beta x \cdot \xi),$$

61 we reach the final expression:

$$\begin{aligned} I_0(p, Q_x, q_x) &= \\ \inf_{\hat{Q}_x, \hat{q}_x} &\left\{ \frac{\beta(p+1)}{2} Q_x \hat{Q}_x - \frac{\beta p(p+1)}{2} q_x \hat{q}_x + \ln \int_{\mathbb{K}} \mathcal{D}_\beta \xi \left[ \int_{\mathbb{K}} P_0(dx) e^{-\frac{\beta(\hat{Q}_x + \hat{q}_x)}{2}|x|^2 + \beta \sqrt{\hat{q}_x} x \cdot \xi} \right]^{p+1} \right\}. \end{aligned} \quad (3)$$

62 **A.2.2 The channel term**  $I_{\text{out}}(p, \mathbf{Q}^z)$

63 This term is very similar to the prior term detailed in the previous section. We use completely similar  
64 replica symmetric assumptions for the overlaps  $\mathbf{Q}^z$  to the ones on  $\mathbf{Q}^x$  described in eq. (2). We reach:

$$I_{\text{out}}(p, Q_z, q_z) = \inf_{\hat{Q}_z, \hat{q}_z} \left\{ \frac{\beta(p+1)}{2} Q_z \hat{Q}_z - \frac{\beta p(p+1)}{2} q_z \hat{q}_z + \frac{\beta(p+1)}{2} \ln(2\pi/(\beta \hat{Q}_z)) \right. \quad (4)$$

$$\left. + \ln \int_{\mathbb{R}} dy \int_{\mathbb{K}} \mathcal{D}_\beta \xi \left[ \int_{\mathbb{K}} dz \left( \frac{2\pi}{\beta \hat{Q}_z} \right)^{-\beta/2} P_{\text{out}}(y|z) e^{-\beta \frac{\hat{Q}_z + \hat{q}_z}{2} |z|^2 + \beta \sqrt{\hat{q}_z} z \cdot \xi} \right]^{p+1} \right\}.$$

65 We normalized the integrals so that in the limit  $p \rightarrow 0$ , the term inside the logarithm goes to 1, which  
66 will be a useful remark.

67 **A.2.3 The delta term**  $I_{\text{int}}(p, \mathbf{Q}^x, \mathbf{Q}^z)$

68 We now turn to the computation of the delta term:

$$I_{\text{int}}(p, \mathbf{Q}^x, \mathbf{Q}^z) \equiv \lim_{n \rightarrow \infty} \frac{1}{n} \ln \mathbb{E}_{\Phi} \left[ \prod_{a=0}^p \delta \left( \mathbf{z}^a - \frac{1}{\sqrt{n}} \Phi \mathbf{x}^a \right) \right], \quad (5)$$

69 assuming that  $\mathbf{Q}^x, \mathbf{Q}^z$  are known. Computing this term is central in this replica calculation. We use,  
70 as is done in [2], the identity:

$$\frac{1}{n} \ln \mathbb{E}_{\Phi} \left[ \prod_{a=0}^p \delta \left( \mathbf{z}^a - \frac{1}{\sqrt{n}} \Phi \mathbf{x}^a \right) \right] = \lim_{\epsilon \downarrow 0} \frac{1}{n} \ln \mathbb{E}_{\Phi} \left[ \frac{\exp \left\{ -\frac{\beta}{2\epsilon} \sum_a \left\| \mathbf{z}^a - \frac{1}{\sqrt{n}} \Phi \mathbf{x}^a \right\|^2 \right\}}{(2\pi\epsilon/\beta)^{\frac{\beta m(p+1)}{2}}} \right], \quad (6)$$

71 and we invert the  $n \rightarrow \infty$  and the  $\epsilon \rightarrow 0$  limit. Let us rewrite the right-hand-side of eq. (6). Since  $\Phi$   
72 is orthogonally (resp. unitarily) invariant, we can write this term as:

$$\mathbb{E} \left[ \frac{\exp \left\{ -\frac{\beta}{2\epsilon} \sum_a \left\| \mathbf{z}^a - \frac{1}{\sqrt{n}} \Phi \mathbf{x}^a \right\|^2 \right\}}{(2\pi\epsilon/\beta)^{\frac{\beta m(p+1)}{2}}} \right] = \mathbb{E} \left[ \frac{\exp \left\{ -\frac{\beta}{2\epsilon} \sum_a \left\| \mathbf{O} \mathbf{z}^a - \frac{1}{\sqrt{n}} \Phi \mathbf{U} \mathbf{x}^a \right\|^2 \right\}}{(2\pi\epsilon/\beta)^{\frac{\beta m(p+1)}{2}}} \right], \quad (7)$$

73 in which the average on the right hand side is made over  $(\Phi, \mathbf{O}, \mathbf{U})$ , with  $(\mathbf{O}, \mathbf{U})$  uniformly sampled  
74 over the orthogonal groups  $\mathcal{U}_\beta(m), \mathcal{U}_\beta(n)$ . Note that since the overlap matrices  $\mathbf{Q}^z, \mathbf{Q}^x$  are fixed, one  
75 can show that when  $\mathbf{U}$  is uniformly distributed over  $\mathcal{U}_\beta(n)$ , the set of vectors  $\{\mathbf{U} \mathbf{x}^a\}_{a=0}^p$  is uniformly  
76 distributed over the set of  $(p+1)$  vectors in  $\mathbb{K}^n$  with overlap matrix  $\mathbf{Q}^x$ . There is a completely  
77 similar result for  $\mathbf{z}$  as well. The consequence is that we can replace in eq. (7) the average over  $\mathbf{O}, \mathbf{U}$   
78 by an average over the vectors satisfying this constraint:

$$I_{\text{int}}(p, \mathbf{Q}^x, \mathbf{Q}^z) \quad (8)$$

$$\simeq \frac{1}{n} \ln \mathbb{E}_{\Phi} \frac{\int_{\mathbb{K}} \prod_a d\mathbf{x}^a d\mathbf{z}^a \left[ \prod_{a \leq b} \delta(nQ_{ab}^x - (\mathbf{x}^a)^\dagger \mathbf{x}^b) \delta(mQ_{ab}^z - (\mathbf{z}^a)^\dagger \mathbf{z}^b) \right] e^{-\frac{\beta}{2\epsilon} \sum_a \left\| \mathbf{z}^a - \frac{1}{\sqrt{n}} \Phi \mathbf{x}^a \right\|^2}}{\int_{\mathbb{K}} \prod_a d\mathbf{x}^a d\mathbf{z}^a \left[ \prod_{a \leq b} \delta(nQ_{ab}^x - (\mathbf{x}^a)^\dagger \mathbf{x}^b) \delta(mQ_{ab}^z - (\mathbf{z}^a)^\dagger \mathbf{z}^b) \right]}.$$

79 The numerator and the denominator correspond to two terms, that we denote  $I_{\text{int}}(p, \mathbf{Q}^x, \mathbf{Q}^z) =$   
80  $I_c^{(n)}(p, \mathbf{Q}^x, \mathbf{Q}^z) - I_c^{(d)}(p, \mathbf{Q}^x, \mathbf{Q}^z)$ . We can introduce the Fourier-transform of the delta distribution  
81 to compute both terms, as in the previous sections. Let us start with the denominator. It reduces after  
82 Fourier-transformation to a Gaussian integral involving a block-diagonal matrix:

$$I_{\text{int}}^{(d)}(p, \mathbf{Q}^x, \mathbf{Q}^z) \simeq \frac{\beta}{2} \inf_{\Gamma^x, \Gamma^z} \left[ \text{Tr}[\mathbf{Q}^x \Gamma^x] + \alpha \text{Tr}[\mathbf{Q}^z \Gamma^z] + (\alpha + 1)(p + 1) \ln \frac{2\pi}{\beta} \right.$$

$$\left. - \ln \det \Gamma^x - \alpha \ln \det \Gamma^z \right],$$

83 with symmetric (Hermitian) positive matrices  $\Gamma^x, \Gamma^z$  of size  $(p+1)$ . The infimum is readily solved  
84 by  $\Gamma^x = (\mathbf{Q}^x)^{-1}$  and  $\Gamma^z = (\mathbf{Q}^z)^{-1}$ , which yields:

$$I_{\text{int}}^{(d)}(p, \mathbf{Q}^x, \mathbf{Q}^z) \simeq \frac{\beta(\alpha + 1)(p + 1)}{2} \left( 1 + \ln \frac{2\pi}{\beta} \right) + \frac{\beta}{2} \ln \det \mathbf{Q}^x + \frac{\alpha\beta}{2} \ln \det \mathbf{Q}^z. \quad (9)$$

85 Let us now compute the numerator with the same technique. We obtain:

$$I_{\text{int}}^{(n)}(p, \mathbf{Q}^x, \mathbf{Q}^z) \simeq \frac{\beta(p+1)}{2} \ln \frac{2\pi}{\beta\epsilon^\alpha} + \frac{\beta}{2} \inf_{\mathbf{\Gamma}^x, \mathbf{\Gamma}^z} \left[ \text{Tr}[\mathbf{Q}^x \mathbf{\Gamma}^x] + \alpha \text{Tr}[\mathbf{Q}^z \mathbf{\Gamma}^z] - \frac{1}{n} \ln \det \mathbf{M}_n \right], \quad (10)$$

86 with a Hermitian matrix  $\mathbf{M}_n$  having a block structure, that we write here in the tensor product form:

$$\mathbf{M}_n \equiv \begin{pmatrix} (\mathbf{\Gamma}^z + \frac{1}{\epsilon} \mathbb{1}_{p+1}) \otimes \mathbb{1}_m & \frac{1}{\epsilon} \mathbb{1}_{p+1} \otimes \frac{\mathbf{\Phi}}{\sqrt{n}} \\ \frac{1}{\epsilon} \mathbb{1}_{p+1} \otimes \frac{\mathbf{\Phi}^\dagger}{\sqrt{n}} & \mathbf{\Gamma}^x \otimes \mathbb{1}_n + \frac{1}{\epsilon} \mathbb{1}_{p+1} \otimes \frac{\mathbf{\Phi}^\dagger \mathbf{\Phi}}{n} \end{pmatrix}. \quad (11)$$

87 Using the block-matrix determinant calculation:

$$\det \begin{pmatrix} A & B \\ C & D \end{pmatrix} = \det A \times \det(D - CA^{-1}B),$$

88 we reach:

$$\begin{aligned} \frac{1}{n} \ln \det \mathbf{M}_n &= \alpha \ln \det \left( \mathbf{\Gamma}^z + \frac{1}{\epsilon} \mathbb{1}_{p+1} \right) \\ &\quad + \frac{1}{n} \ln \det \left( \mathbf{\Gamma}^x \otimes \mathbb{1}_n + \frac{1}{\epsilon} \mathbb{1}_{p+1} \otimes \frac{\mathbf{\Phi}^\dagger \mathbf{\Phi}}{n} - \frac{1}{\epsilon^2} \left( \mathbf{\Gamma}^z + \frac{1}{\epsilon} \mathbb{1}_{p+1} \right)^{-1} \otimes \frac{\mathbf{\Phi}^\dagger \mathbf{\Phi}}{n} \right), \\ &= (\alpha - 1) \ln \det \left( \mathbf{\Gamma}^z + \frac{1}{\epsilon} \mathbb{1}_{p+1} \right) + \frac{1}{n} \ln \det \left( \mathbf{\Gamma}^x \mathbf{\Gamma}^z \otimes \mathbb{1}_n + \frac{1}{\epsilon} \mathbf{\Gamma}^x \otimes \mathbb{1}_n + \frac{1}{\epsilon} \mathbf{\Gamma}^z \otimes \frac{\mathbf{\Phi}^\dagger \mathbf{\Phi}}{n} \right), \\ &= (\alpha - 1) \ln \det \left( \mathbf{\Gamma}^z + \frac{1}{\epsilon} \mathbb{1}_{p+1} \right) + \left\langle \ln \det \left( \mathbf{\Gamma}^x \mathbf{\Gamma}^z + \frac{1}{\epsilon} (\mathbf{\Gamma}^x + \lambda \mathbf{\Gamma}^z) \right) \right\rangle_\nu, \end{aligned}$$

89 with  $\lambda$  distributed according to  $\nu$ , the asymptotic eigenvalue distribution of  $\mathbf{\Phi}^\dagger \mathbf{\Phi}/n$ . This allows to  
90 write  $I_{\text{int}}^{(n)}$  from eq. (10) and to take the  $\epsilon \downarrow 0$  limit, keeping the terms that do not vanish:

$$I_{\text{int}}^{(n)}(p, \mathbf{Q}^x, \mathbf{Q}^z) \simeq \frac{\beta}{2} \inf_{\mathbf{\Gamma}^x, \mathbf{\Gamma}^z} \left[ \text{Tr}[\mathbf{Q}^x \mathbf{\Gamma}^x] + \alpha \text{Tr}[\mathbf{Q}^z \mathbf{\Gamma}^z] - \langle \ln \det(\mathbf{\Gamma}^x + \lambda \mathbf{\Gamma}^z) \rangle_\nu \right]. \quad (12)$$

91 Finally, we again consider a replica-symmetric assumption for  $\mathbf{\Gamma}^x, \mathbf{\Gamma}^z$ , in the form:

$$\mathbf{\Gamma}^x = \begin{pmatrix} \Gamma_x & -\gamma_x & \cdots & -\gamma_x \\ -\gamma_x & \Gamma_x & \cdots & -\gamma_x \\ \vdots & \vdots & \ddots & \vdots \\ -\gamma_x & -\gamma_x & \cdots & \Gamma_x \end{pmatrix}, \quad \mathbf{\Gamma}^z = \begin{pmatrix} \Gamma_z & -\gamma_z & \cdots & -\gamma_z \\ -\gamma_z & \Gamma_z & \cdots & -\gamma_z \\ \vdots & \vdots & \ddots & \vdots \\ -\gamma_z & -\gamma_z & \cdots & \Gamma_z \end{pmatrix}. \quad (13)$$

92 As for the overlap matrices, we have  $\gamma_x, \gamma_z \in \mathbb{R}$ . Combining eqs. (9) and (12) and using the replica  
93 symmetric assumption, we obtain:

$$\begin{aligned} \frac{2}{\beta} I_{\text{int}}(p, \mathbf{Q}_x, \mathbf{Q}_z) &= \inf_{\Gamma_x, \gamma_x, \Gamma_z, \gamma_z} \left[ (p+1)Q_x \Gamma_x - p(p+1)q_x \gamma_x + \alpha(p+1)Q_z \Gamma_z - \alpha p(p+1)q_z \gamma_z \right. \\ &\quad \left. - p \langle \ln(\Gamma_x + \gamma_x + \lambda \Gamma_z + \lambda \gamma_z) \rangle_\nu - \langle \ln[\Gamma_x - p\gamma_x + \lambda(\Gamma_z - p\gamma_z)] \rangle_\nu \right] - (\alpha+1)(p+1) \ln 2\pi e/\beta \\ &\quad + (p+1) \ln \frac{2\pi}{\beta} - p \ln(Q_x - q_x) - \ln(Q_x + pq_x) - \alpha p \ln(Q_z - q_z) - \alpha \ln(Q_z + pq_z). \quad (14) \end{aligned}$$

94 **A note on quenched and annealed averages** Note that here we did not consider the average over  
95  $\mathbf{\Phi}$  to compute  $I_{\text{int}}$ . Indeed, the result only depends on the eigenvalue distribution of  $\mathbf{\Phi}^\dagger \mathbf{\Phi}/n$ , which  
96 (by hypothesis) has large deviations in a scale at least  $n^{1+\eta}$  with  $\eta > 0$ . Since we are looking at a  
97 scale exponential in  $n$ , we can thus consider that this eigenvalue distribution is equal to its limit value  
98  $\nu$ . However, one must be careful that this argument breaks down if our result starts to be sensitive  
99 to the extremal eigenvalues of  $\mathbf{\Phi}^\dagger \mathbf{\Phi}/n$ . Since these variables typically have large deviations in the  
100 scale  $n$  (for instance for Wigner or Wishart matrices [7]), this could invalidate our calculation. This  
101 phenomenon is well-known in the study of so-called ‘‘HCIZ’’ spherical integrals, cf [8] for an example  
102 of a rigorous analysis. We argue in Section A.4 that this possible issue, not discussed in [2], never  
103 arises for physical values of the overlaps.

104 **A.2.4 Expressing the  $p$ -th moment**

105 Combining the results of the three previous sections, we finally obtain the asymptotics of the  $p$ -th  
106 moment of the partition function as:

$$\lim_{n \rightarrow \infty} \frac{1}{n} \ln \mathbb{E} \mathcal{Z}_n(\mathbf{Y})^p = \sup_{\substack{Q_x, q_x \\ Q_z, q_z}} [I_0(p, Q_x, q_x) + \alpha I_{\text{out}}(p, Q_z, q_z) + I_{\text{int}}(p, Q_x, q_x, Q_z, q_z)], \quad (15)$$

107 in which the three terms are given by eqs. (3),(4),(14).

108 **A.3 The  $p \downarrow 0$  limit**

109 One can easily see that the function described in eq. (15) is analytic in  $p$ . The next step of the replica  
110 method is to analytically extend this expression to arbitrary  $p > 0$ , before considering the limit  $p \downarrow 0$ .

111 **A.3.1 Consistency of the limit**

112 One must be careful that, when extending our expression to arbitrarily small  $p > 0$ , we satisfy the  
113 trivial condition  $\lim_{p \downarrow 0} \ln \mathbb{E} Z^p = 0$ . As we will see, this condition will yield constraints on the  
114 diagonals of the overlap matrices. Taking the limit  $p = 0$  in the three terms of eq. (15) yields:

$$I_0(0, Q_x, q_x) = \inf_{\hat{Q}_x} \left\{ \frac{\beta}{2} Q_x \hat{Q}_x + \ln \int_{\mathbb{K}} P_0(dx) e^{-\frac{\beta \hat{Q}_x}{2} |x|^2} \right\}, \quad (16)$$

$$I_{\text{out}}(0, Q_z, q_z) = \inf_{\hat{Q}_z} \left\{ \frac{\beta}{2} Q_z \hat{Q}_z + \frac{\beta}{2} \ln \left( \frac{2\pi}{\beta \hat{Q}_z} \right) \right\}, \quad (17)$$

$$I_{\text{int}}(0, Q_x, q_x, Q_z, q_z) = \inf_{\Gamma_x, \Gamma_z} \left[ \frac{\beta}{2} Q_x \Gamma_x + \frac{\alpha \beta}{2} Q_z \Gamma_z - \frac{\beta}{2} \langle \ln[\Gamma_x + \lambda \Gamma_z] \rangle_\nu \right] \quad (18)$$

$$- \frac{\beta(\alpha + 1)}{2} \left( 1 + \ln \frac{2\pi}{\beta} \right) + \frac{\beta}{2} \ln \frac{2\pi}{\beta} - \frac{\beta}{2} \ln Q_x - \frac{\alpha \beta}{2} \ln Q_z.$$

One can easily solve the saddle point equations on  $Q_z, \hat{Q}_z$ , they give  $\Gamma_z = 0$  and  $\hat{Q}_z = 1/Q_z$ . One  
can then find all the remaining variables easily:  $Q_x = \rho$ ,  $\hat{Q}_x = 0$ ,  $\Gamma_x = \rho^{-1}$ ,  $Q_z = \rho \langle \lambda \rangle_\nu / \alpha$ ,  
 $\hat{Q}_z = 1/Q_z$ ,  $\Gamma_z = 0$ . Plugging these parameters yields (we drop the vacuous dependency on  $q_x, q_z$ ):

$$\begin{cases} I_0(0, Q_x = \rho) = 0, & (19a) \\ I_{\text{out}}\left(0, Q_z = \frac{\rho \langle \lambda \rangle_\nu}{\alpha}\right) = \frac{\beta}{2} + \frac{\beta}{2} \ln \left( \frac{2\pi \rho \langle \lambda \rangle_\nu}{\beta \alpha} \right), & (19b) \\ I_{\text{int}}\left(0, Q_x = \rho, Q_z = \frac{\rho \langle \lambda \rangle_\nu}{\alpha}\right) = -\frac{\beta \alpha}{2} \left( 1 + \ln \frac{2\pi}{\beta} \right) - \frac{\alpha \beta}{2} \ln \frac{\rho \langle \lambda \rangle_\nu}{\alpha}. & (19c) \end{cases}$$

115 Recall that we have

$$\lim_{p \downarrow 0} \lim_{n \rightarrow \infty} \frac{1}{n} \ln \mathbb{E} \mathcal{Z}_n(\mathbf{Y})^p = I_0 + \alpha I_{\text{out}} + I_{\text{int}},$$

116 so that we obtain from eq. (19) that indeed the limit is consistent.

117 **A.3.2 The replica symmetric result**

118 Using eq. (15) for the  $p$ -th moment and the consistency conditions we just derived, we obtain after  
119 using the replica trick:

$$\lim_{n \rightarrow \infty} \frac{1}{n} \mathbb{E} \ln \mathcal{Z}_n(\mathbf{Y}) = \sup_{q_x, q_z} [I_0(q_x) + \alpha I_{\text{out}}(q_z) + I_{\text{int}}(q_x, q_z)], \quad (20)$$

120 with the auxiliary functions:

$$\begin{aligned}
I_0(q_x) &= \inf_{\hat{q}_x \geq 0} \left[ -\frac{\beta \hat{q}_x q_x}{2} + \int_{\mathbb{K}} \mathcal{D}_{\beta} \xi P_0(dx) e^{-\frac{\beta \hat{q}_x}{2} |x|^2 + \beta \sqrt{\hat{q}_x} x \cdot \xi} \ln \int_{\mathbb{K}} P_0(dx) e^{-\frac{\beta \hat{q}_x}{2} |x|^2 + \beta \sqrt{\hat{q}_x} x \cdot \xi} \right], \\
I_{\text{out}}(q_z) &= \inf_{\hat{q}_z \geq 0} \left\{ -\frac{\beta \hat{q}_z q_z}{2} - \frac{\beta}{2} \ln(\hat{Q}_z + \hat{q}_z) + \frac{\beta \hat{q}_z}{2 \hat{Q}_z} + \int dy \mathcal{D}_{\beta} \xi J(\hat{q}_z, y, \xi) \ln J(\hat{q}_z, y, \xi) \right\}, \\
I_{\text{int}}(q_x, q_z) &= \inf_{\gamma_x, \gamma_z \geq 0} \left[ \frac{\beta}{2} (\rho - q_x) \gamma_x + \frac{\alpha \beta}{2} (Q_z - q_z) \gamma_z - \frac{\beta}{2} (\ln(\rho^{-1} + \gamma_x + \lambda \gamma_z))_{\nu} \right] \\
&\quad - \frac{\beta}{2} \ln(\rho - q_x) - \frac{\beta q_x}{2\rho} - \frac{\alpha \beta}{2} \ln(Q_z - q_z) - \frac{\alpha \beta q_z}{2Q_z},
\end{aligned}$$

121 with  $Q_z = \rho(\lambda)_{\nu}/\alpha$  and  $\hat{Q}_z = 1/Q_z$ . Moreover, the domain of the supremum is  $q_x \in [0, \rho]$  and  
122  $q_z \in [0, Q_z]$ . The function  $J(\hat{q}_z, y, \xi)$  appearing in the expression of  $I_{\text{out}}$  is defined as:

$$J(\hat{q}_z, y, \xi) \equiv \int_{\mathbb{K}} \mathcal{D}_{\beta} z P_{\text{out}} \left( y \middle| \frac{z}{\sqrt{\hat{Q}_z + \hat{q}_z}} + \sqrt{\frac{\hat{q}_z}{\hat{Q}_z(\hat{Q}_z + \hat{q}_z)}} \xi \right).$$

123 Note that compared to the calculation presented in the previous sections, we moved a term  $(\beta\alpha/2)(1 +$   
124  $\ln 2\pi/\beta)$  between  $I_{\text{out}}$  and  $I_{\text{int}}$ , and we also made a few straightforward change of variables in the  
125 expression of  $I_{\text{out}}$ . This is exactly the result given in Conjecture 2.1, which ends our replica  
126 calculation.

#### 127 A.4 Concentration of the spectrum of $\Phi^{\dagger} \Phi/n$ and the absence of saturation

128 As emphasized in the end of Section A.2.3, our calculation assumed that the extremization equations  
129 on  $(\gamma_x, \gamma_z)$  always admitted a solution. Moreover, we assumed that this solution is not sensitive to the  
130 extremal eigenvalues of  $\Phi^{\dagger} \Phi/n$ . If this assumption is indeed true, the concentration of the spectrum  
131 of  $\Phi^{\dagger} \Phi/n$  was assumed to be fast enough to justify our calculation. This important condition can be  
132 phrased by saying that for all physical values of  $(q_x, q_z)$ , we must not touch the edge of the spectrum:

$$\frac{1}{\rho} + \gamma_x + \gamma_z \lambda_{\min}(\nu) > 0. \quad (21)$$

133 We justify here eq. (21) for all physical values of  $(q_x, q_z)$ . We will combine three arguments:

- 134 (i) Note that in the replica calculation, cf Section A.2.3, the matrix  $\Gamma^z$  is assumed to be  
135 Hermitian positive in the  $p \downarrow 0$  limit. Since  $\Gamma_z = 0$ , this implies that we must have  $\lambda_z \geq 0$ .  
136 (ii) The saddle point equation on  $q_x$  yields<sup>1</sup>:

$$\hat{q}_x = \frac{q_x}{\rho(\rho - q_x)} - \gamma_x. \quad (22)$$

- 137 (iii) Finally, we will derive a lower bound on  $q_x$ . Note that, as one can see in  $I_0$  from Sec-  
138 tion A.3.2,  $q_x$  is the optimal overlap achievable in the following scalar inference problem  
139 [9]:

$$Y_0 = \sqrt{\hat{q}_x} X^* + Z, \quad (23)$$

140 in which one observes  $Y_0$  and is given  $P_0$  the prior distribution on  $X^*$ , and the noise  $Z$   
141 is distributed according to  $\mathcal{N}_{\beta}(0, 1)$ . It is known that the optimal estimator is given by  
142 the average of  $\mathbb{E}[x|Y]$  under the posterior distribution, whose density is proportional to  
143  $P_0(x) e^{-\frac{\beta}{2} |y - \sqrt{\hat{q}_x} x|^2}$ . If this is untractable for generic  $P_0$ , we can consider a suboptimal  
144 estimation by using a Gaussian prior with variance  $\rho$  in the estimation procedure (so that the  
145 problem is mismatched). This yields the bound:

$$q_x \geq \int \mathcal{D}_{\beta} \xi \frac{\left[ \int_{\mathbb{K}} P_0(dx) x e^{-\frac{\beta \hat{q}_x}{2} |x|^2 + \beta \sqrt{\hat{q}_x} x \cdot \xi} \right] \cdot \left[ \int_{\mathbb{K}} dx x e^{-\frac{\beta |x|^2}{2\rho}} e^{-\frac{\beta \hat{q}_x}{2} |x|^2 + \beta \sqrt{\hat{q}_x} x \cdot \xi} \right]}{\int_{\mathbb{K}} dx e^{-\frac{\beta |x|^2}{2\rho}} e^{-\frac{\beta \hat{q}_x}{2} |x|^2 + \beta \sqrt{\hat{q}_x} x \cdot \xi}}. \quad (24)$$

<sup>1</sup>This relation is valid even if  $\lambda_x$  would “saturate” to a constant value that does not depend on  $(q_x, q_z)$ .

146

This can easily be simplified by performing the Gaussian integral, and yields the bound:

$$q_x \geq \frac{\rho^2 \hat{q}_x}{1 + \rho \hat{q}_x}. \quad (25)$$

147 Combining (ii) and (iii) gives:

$$q_x \geq \rho - \frac{\rho - q_x}{1 - \gamma_x(\rho - q_x)}. \quad (26)$$

148 Since  $q_x \in [0, \rho]$ , this implies in particular that  $\gamma_x \geq 0$ . Using this along with (i), this implies:

$$\frac{1}{\rho} + \gamma_x + \gamma_z \lambda_{\min}(\nu) \geq \frac{1}{\rho} > 0, \quad (27)$$

149 which is what we wanted to show.

150 **B Derivation of the weak-recovery threshold**

We detail here the derivation of the algorithmic weak-recovery threshold  $\alpha_{\text{WR, Algo}}$ . As discussed in Section 3, the weak-recovery threshold can be identified as the sample complexity for which the trivial fixed point  $q_x = q_z = \hat{q}_x = \hat{q}_z = \gamma_x = \gamma_z = 0$  of the state evolution equations becomes linearly unstable (when it no longer is a local maximum of the free entropy potential). Consider therefore the state evolution equations, which we repeat here for convenience in a detailed form:

$$q_x = \int_{\mathbb{K}} \mathcal{D}_{\beta} \xi \frac{\left| \int_{\mathbb{K}} P_0(dx) x e^{-\frac{\beta}{2} \hat{q}_x |x|^2 + \beta \sqrt{\hat{q}_x} x \cdot \xi} \right|^2}{\int_{\mathbb{K}} P_0(dx) e^{-\frac{\beta}{2} \hat{q}_x |x|^2 + \beta \sqrt{\hat{q}_x} x \cdot \xi}}, \quad (28a)$$

$$q_z = \frac{1}{\hat{Q}_z + \hat{q}_z} \left[ \frac{\hat{q}_z}{\hat{Q}_z} + \int dy \mathcal{D}_{\beta} z \frac{\left| \int \mathcal{D}_{\beta} z z P_{\text{out}} \left( y \left| \frac{z}{\sqrt{\hat{Q}_z + \hat{q}_z}} + \sqrt{\frac{\hat{q}_z}{\hat{Q}_z(\hat{Q}_z + \hat{q}_z)}} \xi \right) \right|^2}{\int \mathcal{D}_{\beta} z P_{\text{out}} \left( y \left| \frac{z}{\sqrt{\hat{Q}_z + \hat{q}_z}} + \sqrt{\frac{\hat{q}_z}{\hat{Q}_z(\hat{Q}_z + \hat{q}_z)}} \xi \right) \right)} \right], \quad (28b)$$

$$\hat{q}_x = \frac{q_x}{\rho(\rho - q_x)} - \gamma_x, \quad (28c)$$

$$\hat{q}_z = \frac{q_z}{Q_z(Q_z - q_z)} - \gamma_z, \quad (28d)$$

$$\rho - q_x = \left\langle \frac{1}{\rho^{-1} + \gamma_x + \lambda \gamma_z} \right\rangle_{\nu}, \quad (28e)$$

$$\alpha(Q_z - q_z) = \left\langle \frac{\lambda}{\rho^{-1} + \gamma_x + \lambda \gamma_z} \right\rangle_{\nu}. \quad (28f)$$

151 Letting  $q_x = q_z = \hat{q}_x = \hat{q}_z = \gamma_x = \gamma_z = 0$ , it is clear that the equations are satisfied if the signal  
152 distribution  $P_0$  and the likelihood  $P_{\text{out}}$  satisfy the following symmetry conditions:

$$|x_1| = |x_2| \Rightarrow P_0(x_1) = P_0(x_2) \quad \text{and} \quad |z_1| = |z_2| \Rightarrow P_{\text{out}}(y|z_1) = P_{\text{out}}(y|z_2).$$

153 Assuming these conditions hold, we are interested in studying the linear stability of this local  
154 maximum. Recalling that  $Q_z = \rho \langle \lambda \rangle_{\nu} / \alpha$ , the first, third and fourth equations of eq. (28) can be  
155 linearized:

$$\delta q_x = \rho^2 \delta \hat{q}_x, \quad \delta \hat{q}_x = \frac{\delta q_x}{\rho^2} - \delta \gamma_x, \quad \delta \hat{q}_z = \frac{\alpha^2 \delta q_z}{\rho^2 \langle \lambda \rangle_{\nu}^2} - \delta \gamma_z. \quad (29)$$

156 Now focusing on the second state evolution equation (28), it can be linearized to give:

$$\delta q_z = \frac{\rho^2 \langle \lambda \rangle_{\nu}^2}{\alpha^2} \delta \hat{q}_z \left( 1 + \int_{\mathbb{R}} dy \frac{\left| \int_{\mathbb{K}} \mathcal{D}_{\beta} z (|z|^2 - 1) P_{\text{out}} \left( y \left| \frac{\rho \langle \lambda \rangle_{\nu}}{\alpha} z \right| \right) \right|^2}{\int_{\mathbb{K}} \mathcal{D}_{\beta} z P_{\text{out}} \left( y \left| \frac{\rho \langle \lambda \rangle_{\nu}}{\alpha} z \right| \right)} \right). \quad (30)$$

Finally, it remains to compute the infinitesimal variation for  $\delta \gamma_x, \delta \gamma_z$ :

$$\begin{cases} \delta \gamma_x = \frac{\langle \lambda^2 \rangle_{\nu}}{\rho^2 [\langle \lambda^2 \rangle_{\nu} - \langle \lambda \rangle_{\nu}^2]} \delta q_x - \frac{\alpha \langle \lambda \rangle_{\nu}}{\rho^2 [\langle \lambda^2 \rangle_{\nu} - \langle \lambda \rangle_{\nu}^2]} \delta q_z, \\ \delta \gamma_z = -\frac{\langle \lambda \rangle_{\nu}}{\rho^2 [\langle \lambda^2 \rangle_{\nu} - \langle \lambda \rangle_{\nu}^2]} \delta q_x + \frac{\alpha}{\rho^2 [\langle \lambda^2 \rangle_{\nu} - \langle \lambda \rangle_{\nu}^2]} \delta q_z. \end{cases} \quad (31a)$$

$$\begin{cases} \delta \gamma_x = \frac{\langle \lambda^2 \rangle_{\nu}}{\rho^2 [\langle \lambda^2 \rangle_{\nu} - \langle \lambda \rangle_{\nu}^2]} \delta q_x - \frac{\alpha \langle \lambda \rangle_{\nu}}{\rho^2 [\langle \lambda^2 \rangle_{\nu} - \langle \lambda \rangle_{\nu}^2]} \delta q_z, \\ \delta \gamma_z = -\frac{\langle \lambda \rangle_{\nu}}{\rho^2 [\langle \lambda^2 \rangle_{\nu} - \langle \lambda \rangle_{\nu}^2]} \delta q_x + \frac{\alpha}{\rho^2 [\langle \lambda^2 \rangle_{\nu} - \langle \lambda \rangle_{\nu}^2]} \delta q_z. \end{cases} \quad (31b)$$

Combining eqs. (29),(30),(31), we can simplify the system to a closed set equations with only  $(\delta q_x, \delta \hat{q}_x, \delta q_z, \delta \hat{q}_z)$ . Given the usual heuristics of the replica method and its link with the state evolution equations of message-passing algorithms [2, 6, 10], one can conjecture that the simplest iteration scheme corresponds to the state evolution of the G-VAMP message passing algorithm:

$$\begin{cases} \delta q_x^{t+1} = \rho^2 \delta \hat{q}_x^t, & (32a) \\ \delta q_z^{t+1} = \frac{\rho^2 \langle \lambda \rangle_\nu^2}{\alpha^2} \delta \hat{q}_z^t \left( 1 + \int_{\mathbb{R}} dy \frac{\left| \int_{\mathbb{K}} \mathcal{D}_\beta z (|z|^2 - 1) P_{\text{out}}(y | \sqrt{\frac{\rho \langle \lambda \rangle_\nu}{\alpha}} z) \right|^2}{\int_{\mathbb{K}} \mathcal{D}_\beta z P_{\text{out}}(y | \sqrt{\frac{\rho \langle \lambda \rangle_\nu}{\alpha}} z)} \right), & (32b) \\ \delta \hat{q}_x^t = -\frac{\langle \lambda \rangle_\nu^2}{\rho^2 [\langle \lambda^2 \rangle_\nu - \langle \lambda \rangle_\nu^2]} \delta q_x^t + \frac{\alpha \langle \lambda \rangle_\nu}{\rho^2 [\langle \lambda^2 \rangle_\nu - \langle \lambda \rangle_\nu^2]} \delta q_z^t, & (32c) \\ \delta \hat{q}_z^t = \frac{\langle \lambda \rangle_\nu}{\rho^2 [\langle \lambda^2 \rangle_\nu - \langle \lambda \rangle_\nu^2]} \delta q_x^t + \left[ \frac{\alpha^2}{\rho^2 \langle \lambda \rangle_\nu^2} - \frac{\alpha}{\rho^2 [\langle \lambda^2 \rangle_\nu - \langle \lambda \rangle_\nu^2]} \right] \delta q_z^t. & (32d) \end{cases}$$

157 From these equations, one can easily see that a linear instability of the trivial fixed points appears at  
158  $\alpha = \alpha_{\text{WR,Algo}}$  satisfying the equation:

$$\alpha_{\text{WR,Algo}} = \frac{\langle \lambda \rangle_\nu^2}{\langle \lambda^2 \rangle_\nu} \left( 1 + \left[ \int_{\mathbb{R}} dy \frac{\left| \int_{\mathbb{K}} \mathcal{D}_\beta z (|z|^2 - 1) P_{\text{out}}(y | \sqrt{\frac{\rho \langle \lambda \rangle_\nu}{\alpha_{\text{WR,Algo}}}} z) \right|^2}{\int_{\mathbb{K}} \mathcal{D}_\beta z P_{\text{out}}(y | \sqrt{\frac{\rho \langle \lambda \rangle_\nu}{\alpha_{\text{WR,Algo}}}} z)} \right]^{-1} \right). \quad (33)$$

159 Indeed at  $\alpha = \alpha_{\text{WR,Algo}}$ , the modulus of all the eigenvalues of the size-4 matrix of the linear  
160 system (32) cross 1.

## 161 C The full recovery transition

162 In this section, we assume a Gaussian standard prior  $P_0 = \mathcal{N}_\beta(0, 1)$  and a noiseless phase retrieval  
163 channel, and we show that information-theoretic full recovery is achieved exactly at  $\alpha = \alpha_{\text{FR,IT}} \equiv$   
164  $\beta(1 - \nu(\{0\}))$ . We can assume without loss of generality that  $\langle \lambda \rangle_\nu = \alpha$ , as this amounts to a simple  
165 rescaling of  $\Phi$ , irrelevant under the noiseless channel. This implies in particular that  $Q_z = \hat{Q}_z = 1$ .

### 166 C.1 The state evolution equations

Since we assumed a Gaussian prior, we have, with  $P_{\text{out}}(y|z) = \delta(y - |z|^2)$ :

$$\left\{ \begin{aligned} q_z &= \frac{1}{1 + \hat{q}_z} \left[ \hat{q}_z + \int dy \int_{\mathbb{K}} \mathcal{D}_\beta \xi \frac{\left| \int_{\mathbb{K}} \mathcal{D}_\beta z z P_{\text{out}}\left(y \left| \frac{z}{\sqrt{1 + \hat{q}_z}} + \sqrt{\frac{\hat{q}_z}{1 + \hat{q}_z}} \xi \right. \right) \right|^2}{\int_{\mathbb{K}} \mathcal{D}_\beta z P_{\text{out}}\left(y \left| \frac{z}{\sqrt{1 + \hat{q}_z}} + \sqrt{\frac{\hat{q}_z}{1 + \hat{q}_z}} \xi \right. \right)} \right], & (34a) \\ \hat{q}_x &= \frac{q_x}{1 - q_x}, & (34b) \\ \hat{q}_z &= \frac{q_z}{1 - q_z} - \gamma_z, & (34c) \\ q_x &= \alpha \gamma_z (1 - q_z), & (34d) \\ \alpha(1 - q_z) &= \left\langle \frac{\lambda}{1 + \lambda \gamma_z} \right\rangle_\nu. & (34e) \end{aligned} \right.$$

167 Comparing these equations to Conjecture 2.1, one can see that we imposed  $\gamma_x = 0$ , a straightforward  
168 consequence of the Gaussian prior (see Section E where this calculation is detailed for a different  
169 purpose).

### 170 C.2 Noisy phase retrieval with small variance

171 We wish to show that the free entropy of the full recovery solution is the global maximum of the  
172 free entropy potential for  $\alpha > \alpha_{\text{IT}}$ , while it is never the case for  $\alpha < \alpha_{\text{IT}}$ . However, under a



173 noiseless channel, the free entropy potential might diverge in this point, which indicates towards a  
 174 regularization procedure. Therefore we consider a noisy Gaussian channel with noise  $\Delta > 0$ :

$$P_{\text{out}}(y|z) = \frac{1}{\sqrt{2\pi\Delta}} \exp\left\{-\frac{1}{2\Delta}(y - |z|^2)^2\right\}. \quad (35)$$

We will compute the limit, as  $\Delta \downarrow 0$ , of the free entropy of the ‘‘almost perfect’’ recovery fixed point. We look for a solution close to the point which corresponds to the best possible recovery:

$$\begin{cases} q_x = 1 - \nu(\{0\}), & (36a) \\ q_z = 1. & (36b) \end{cases}$$

Indeed it is easy to see that  $q_x \leq 1 - \nu(\{0\})$  since  $\text{rk}[\Phi^\dagger \Phi] \sim n(1 - \nu(\{0\}))$ . We are thus looking for a fixed point of the state evolution equations (34) that satisfies:

$$\begin{cases} q_x = 1 - \nu(\{0\}) + \mathcal{O}_\Delta(1), & (37a) \\ q_z = 1 + \mathcal{O}_\Delta(1), & (37b) \\ \hat{q}_x^{-1} = \nu(\{0\})/(1 - \nu(\{0\})) + \mathcal{O}_\Delta(1), & (37c) \\ \hat{q}_z^{-1} = \mathcal{O}_\Delta(1). & (37d) \end{cases}$$

175 Let us now precise the asymptotics of these quantities as  $\Delta \downarrow 0$ . By eq. (34d), we find easily:

$$\gamma_z \sim \frac{1 - \nu(\{0\})}{\alpha(1 - q_z)}. \quad (38)$$

176 Then from eq. (34c), we also have:

$$\hat{q}_z \sim \frac{\alpha - 1 + \nu(\{0\})}{\alpha(1 - q_z)}. \quad (39)$$

177 Note that if  $\alpha \leq 1$ , then necessarily  $\nu(\{0\}) \geq 1 - \alpha$ , so that the quantity in the numerator is always  
 178 positive. We now turn to eq. (34a). We assume the scaling  $\hat{q}_z^{-1} = c\Delta + \mathcal{O}_\Delta(\Delta)$ . We have by Gaussian  
 179 integration by parts and using the specific form of  $P_{\text{out}}$ :

$$\begin{aligned} & \int dy \mathcal{D}_\beta \xi \frac{\left| \int \mathcal{D}_\beta z z P_{\text{out}}\left(y \left| \frac{z}{\sqrt{1+\hat{q}_z}} + \sqrt{\frac{\hat{q}_z}{1+\hat{q}_z}} \xi\right.\right) \right|^2}{\int \mathcal{D}_\beta z P_{\text{out}}\left(y \left| \frac{z}{\sqrt{1+\hat{q}_z}} + \sqrt{\frac{\hat{q}_z}{1+\hat{q}_z}} \xi\right.\right)} \\ &= \frac{1}{(1 + \hat{q}_z)} \int dy \mathcal{D}_\beta \xi \frac{\left| \int \mathcal{D}_\beta z P'_{\text{out}}\left(y \left| \frac{z}{\sqrt{1+\hat{q}_z}} + \sqrt{\frac{\hat{q}_z}{1+\hat{q}_z}} \xi\right.\right) \right|^2}{\int \mathcal{D}_\beta z P_{\text{out}}\left(y \left| \frac{z}{\sqrt{1+\hat{q}_z}} + \sqrt{\frac{\hat{q}_z}{1+\hat{q}_z}} \xi\right.\right)} \sim \frac{4}{\Delta(1 + \hat{q}_z)} \sim 4c. \end{aligned}$$

180 Gaussian integration by parts and our conventions for derivatives of real functions of complex  
 181 variables are summarized in Section F.2. This yields that  $1 - q_z = \Delta c(1 - 4c) + \mathcal{O}_\Delta(1)$ . Combining  
 182 this result with eq. (39), we have

$$c(1 - 4c) = c \left[ \frac{\alpha - 1 + \nu(\{0\})}{\alpha} \right].$$

This implies  $c = (1 - \nu(\{0\})) / (4\alpha)$ , and we finally obtain the leading order asymptotics of  $q_z, \hat{q}_z, \gamma_z$  as  $\Delta \rightarrow 0$ :

$$\begin{cases} \hat{q}_z = \frac{4\alpha}{(1 - \nu(\{0\}))\Delta} + \mathcal{O}_\Delta(\Delta^{-1}), & (40a) \\ 1 - q_z = \frac{(1 - \nu(\{0\}))(\alpha - 1 + \nu(\{0\}))}{4\alpha^2} \Delta + \mathcal{O}_\Delta(\Delta), & (40b) \\ \gamma_z = \frac{4\alpha}{\Delta(\alpha - 1 + \nu(\{0\}))} + \mathcal{O}_\Delta(\Delta^{-1}). & (40c) \end{cases}$$

183 Let us now compute the asymptotics of the three auxiliary functions  $I_0$ ,  $I_{\text{out}}$  and  $I_{\text{int}}$  of Conjecture 2.1:

$$\begin{aligned}
I_0(q_x) &= \frac{\beta}{2}[q_x + \ln(1 - q_x)], \\
I_{\text{out}}(q_z) &= -\frac{\beta\hat{q}_z q_z}{2} - \frac{\beta}{2} \ln(1 + \hat{q}_z) + \frac{\beta\hat{q}_z}{2} + \int dy \mathcal{D}\xi J(\hat{q}_z, y, \xi) \ln J(\hat{q}_z, y, \xi), \\
J(\hat{q}_z, y, \xi) &\equiv \int \mathcal{D}z P_{\text{out}}\left(y \left| \frac{z}{\sqrt{1 + \hat{q}_z}} + \sqrt{\frac{\hat{q}_z}{1 + \hat{q}_z}} \xi \right.\right), \\
I_{\text{int}}(q_x, q_z) &= \frac{\beta}{2}[\alpha(1 - q_z)\gamma_z - \langle \ln(1 + \lambda\gamma_z) \rangle_\nu - \ln(1 - q_x) - q_x - \alpha \ln(1 - q_z) - \alpha q_z].
\end{aligned}$$

184 Using eq. (40) and the specific form of the channel, we reach:

$$\begin{aligned}
I_0(q_x) + I_{\text{int}}(q_x, q_z) &\sim -\frac{\beta(\alpha - 1 + \nu(\{0\}))}{2} \ln \Delta, \\
I_{\text{out}}(q_z) &\sim \frac{(\beta - 1)}{2} \ln \Delta.
\end{aligned}$$

185 Therefore when considering the total free entropy we have

$$\begin{aligned}
I_0(q_x) + I_{\text{int}}(q_x, q_z) + \alpha I_{\text{out}}(q_z) &\sim \frac{\alpha(\beta - 1) - \beta(\alpha - 1 + \nu(\{0\}))}{2} \ln \Delta, \\
&\sim \frac{\beta(1 - \nu(\{0\})) - \alpha}{2} \ln \Delta.
\end{aligned}$$

186 This implies that the full recovery point has a free entropy of  $-\infty$  for  $\alpha < \alpha_{\text{FR,IT}} \equiv \beta(1 - \nu(\{0\}))$ ,  
187 and  $+\infty$  for  $\alpha > \alpha_{\text{FR,IT}}$ . Thus this point is always the global maximum of the free entropy for  
188  $\alpha > \alpha_{\text{FR,IT}}$ , while it is never the case for  $\alpha < \alpha_{\text{FR,IT}}$ , which ends our argument.

## 189 D Proof of Theorem 2.2

190 In all this section, we provide the proof of Theorem 2.2 under  $(H0)$ ,  $(h1)$ ,  $(h2)$ ,  $(h3)$ , and we will  
191 work under these hypotheses. In Section D.6, we show how the proof can be extended to hypothe-  
192 ses  $(H0)$ ,  $(h'1)$ .

193 First, we simplify the conjectured expression of the free entropy of Conjecture 2.1 using the particular  
194 form of the prior  $P_0$  and of the sensing matrix  $\Phi$ . Finally, using  $(h1)$ ,  $(h2)$ ,  $(h3)$  and a proof similar to  
195 the one of [9, 11], we give a rigorous derivation of this simplified expression. Note that with respect  
196 to the analysis of [9, 11], there are two main novelties in our setting:

- 197 (i) The sensing matrix  $\Phi$  is not i.i.d. but has a well-controlled structure, see  $(h2)$ .
- 198 (ii) The variables can be complex numbers. We will argue that the arguments generalize to  
199 this case. The physical reason of this generalization is that even in the complex setting, the  
200 overlap will concentrate on a real positive number, as a consequence of Bayes-optimality.

201 First, we note that we can simplify the replica conjecture under the considered hypotheses:

202 **Proposition D.1.** *Under  $(H0)$ ,  $(h1)$ ,  $(h2)$ ,  $(h3)$ , the replica conjecture 2.1 for the free entropy  $f_n \equiv$   
203  $\frac{1}{n} \mathbb{E} \ln \mathcal{Z}_n(\mathbf{Y})$  is equivalent to:*

$$\lim_{n \rightarrow \infty} f_n = \sup_{\hat{q} \geq 0} \inf_{q \in [0, Q_z]} \left[ \frac{\beta\hat{q}}{2} (\mathbb{E}_{\nu_B}[X] - \delta q) - \frac{\beta}{2} \mathbb{E}_{\nu_B} \ln(1 + \hat{q}X) + \alpha \Psi_{\text{out}}(q) \right], \quad (41)$$

204 with  $Q_z \equiv \mathbb{E}_{\nu_B}[X]/\delta$  and  $\Psi_{\text{out}}$  defined in terms of the auxiliary functions introduced in eq. (7):

$$\Psi_{\text{out}}(q) \equiv \mathbb{E}_\xi \int_{\mathbb{R}} dy \mathcal{Z}_{\text{out}}(y; \sqrt{q}\xi, Q_z - q) \ln \mathcal{Z}_{\text{out}}(y; \sqrt{q}\xi, Q_z - q).$$

205 Proposition D.1 is proven in Section E. To prove the free entropy statement of Theorem 2.2, we  
206 therefore just need to show:

207 **Lemma D.2.** *Under the assumptions of Proposition D.1, the limit of the free entropy  $f_n \equiv$*   
 208  *$\frac{1}{n} \mathbb{E} \ln \mathcal{Z}_n(\mathbf{Y})$  is given by eq. (41).*

209 The following of this section is dedicated to the proof of Lemma D.2. We will conclude the proof  
 210 of Theorem 2.2 in Section D.5 and Section D.6, dedicated respectively to the proof of the MMSE  
 211 statement and the extension of the proof to hypotheses  $(H0), (h'1)$ .

212 The main idea of our proof is to reduce the problem of Lemma D.2 to a Generalized Linear Model  
 213 with a Gaussian sensing matrix, but a non-i.i.d. prior. We make use of the ‘‘SVD’’ decomposition of  
 214  $\mathbf{B}/\sqrt{n} = \mathbf{U}\mathbf{S}\mathbf{V}^\dagger$ , with  $\mathbf{U} \in \mathcal{U}_\beta(p)$ ,  $\mathbf{V} \in \mathcal{U}_\beta(n)$ , and  $\mathbf{S} \in \mathbb{R}^{p \times n}$  a pseudo-diagonal matrix with positive  
 215 elements. Leveraging on the fact that the prior  $P_0$  is Gaussian, and that  $\mathbf{W}$  is an i.i.d. Gaussian  
 216 matrix independent of  $\mathbf{B}$ , one can see that our estimation problem is formally equivalent to an usual  
 217 Generalized Linear Model with  $m$  measurements, a signal of dimension  $p$ , and a Gaussian i.i.d.  
 218 sensing matrix. This is very close to the setup of [9], a key difference being that here the prior  
 219 distribution on the data  $\mathbf{Z}^* \in \mathbb{K}^p$  is defined as

- 220 • If  $\delta \leq 1$ , for every  $k \in \{1, \dots, p\}$ ,  $Z_k^*$  is distributed as  $S_k X_k^*$  with  $X_k^* \stackrel{\text{i.i.d.}}{\sim} P_0$ .
- 221 • If  $\delta \geq 1$ , for every  $k \in \{1, \dots, n\}$ ,  $Z_k^*$  is distributed as  $S_k X_k^*$  with  $X_k^* \stackrel{\text{i.i.d.}}{\sim} P_0$ , while for  
 222 every  $k \in \{n+1, \dots, p\}$ ,  $Z_k^*$  is almost surely 0.

223 More precisely, we can define rigorously the prior  $P_0^{(\mathbf{S})}$  described above by its linear statistics. For  
 224 any continuous bounded function  $g : \mathbb{K}^p \rightarrow \mathbb{R}$ , one has:

$$\int_{\mathbb{K}^p} P_0^{(\mathbf{S})}(\mathbf{d}\mathbf{z})g(\mathbf{z}) \equiv \int_{\mathbb{K}^n} \left\{ \prod_{i=1}^n P_0(\mathbf{d}x_i) \right\} g(\{\mathbb{1}[k \leq n] S_k x_k\}_{k=1}^p). \quad (42)$$

225 Hypothesis (h1) implies that we will consider  $P_0 = \mathcal{N}_\beta(0, 1)$ . In the following of the section, we  
 226 give the detailed sketch of the proof of Lemma D.2. Some facts and lemmas will be a generalization  
 227 or a consequence of the works of [9] and [11], and we will refer to them when necessary.

## 228 D.1 Interpolating estimation problem

229 Recall that  $Q_z \equiv \rho\langle \lambda \rangle_\nu / \alpha = \mathbb{E}_{\nu_B}[X]/\delta$ , and the definition of  $\Psi_{\text{out}}$  in Proposition D.1. We define as  
 230 well:

$$r_{\max} \equiv \sup_{q \in [0, Q_z]} \Psi_{\text{out}}(q), \quad (43)$$

$$\Psi_0^{(\nu)}(r) \equiv \frac{\beta}{2} [r \mathbb{E}_{\nu_B}[X] - \mathbb{E}_{\nu_B} \ln(1 + rX)], \quad 0 \leq r \leq r_{\max}. \quad (44)$$

231 Since  $\nu_B \neq \delta_0$  by hypothesis, we can easily check that  $\Psi_0^{(\nu)}$  is strictly convex,  $\mathcal{C}^2$  and non-decreasing  
 232 on  $[0, r_{\max}]$ . By Proposition 18 of [9], which directly generalizes to the complex case, we know as  
 233 well that  $\Psi_{\text{out}}$  is convex,  $\mathcal{C}^2$ , and non-decreasing on  $[0, Q_z]$ , and thus  $r_{\max} = \Psi_{\text{out}}(Q_z)$ . Let us fix  
 234 an arbitrary sequence  $s_n > 0$  that goes to 0 as  $n$  goes to infinity. We fix  $\epsilon_2 \in [s_n, 2s_n]$ , and  $\epsilon_1 \in \mathcal{D}_n^\beta$ ,  
 235 with

$$\mathcal{D}_n^\beta \equiv \{\lambda \in \mathcal{S}_\beta(\mathbb{R}) : \forall l \in \{1, \beta\}, \lambda_{ll} \in (2\beta s_n, (2\beta + 1)s_n), \forall l \neq l' \in \{1, \beta\}, \lambda_{ll'} \in (s_n, 2s_n)\}.$$

236  $\mathcal{D}_n^\beta$  is composed of strictly diagonally dominant matrices with positive entries, which implies that  
 237  $\mathcal{D}_n \subset \mathcal{S}_\beta^+(\mathbb{R})$ . Let  $q_\epsilon : [0, 1] \rightarrow [0, Q_z]$ ,  $r_\epsilon : [0, 1] \rightarrow [0, r_{\max}]$  be two continuous ‘‘interpolation’’  
 238 functions. For all  $\epsilon \in \mathcal{D}_n^\beta \times [s_n, 2s_n]$ , and all  $t \in [0, 1]$  we define:

$$\mathcal{S}_\beta^+(\mathbb{R}) \ni R_1(t, \epsilon) \equiv \epsilon_1 + \left( \int_0^t r_\epsilon(v) dv \right) \mathbb{1}_\beta, \quad \mathbb{R}_+ \ni R_2(t, \epsilon) \equiv \epsilon_2 + \int_0^t q_\epsilon(v) dv. \quad (45)$$

We consider the following decoupled observation channels:

$$\left\{ \left\{ Y_{t,\mu} \sim P_{\text{out}} \left( \cdot \mid \sqrt{\frac{1-t}{p}} [\mathbf{W}\mathbf{Z}^*]_\mu + \sqrt{R_2(t, \epsilon)} V_\mu + \sqrt{Q_z t - R_2(t, \epsilon) + 2s_n A_\mu^*} \right) \right\}_{\mu=1}^m \right\} \quad (46a)$$

$$\left\{ \tilde{\mathbf{Y}}_t = (R_1(t, \epsilon))^{1/2} \star \mathbf{Z}^* + \boldsymbol{\zeta}, \right. \quad (46b)$$

239 where  $V_\mu, A_\mu^* \stackrel{\text{i.i.d.}}{\sim} \mathcal{N}_\beta(0, 1)$ , and  $\zeta \sim \mathcal{N}_\beta(0, \mathbb{1}_p)$ . The prior distribution on  $\mathbf{Z}^*$  is given by  $P_0^{(\mathbf{S})}$  in  
 240 eq. (42). We assume that  $\{V_\mu\}_{\mu=1}^m$  is known, and the inference problem is to recover both  $\mathbf{A}^* \in \mathbb{K}^m$   
 241 and  $\mathbf{Z}^* \in \mathbb{K}^p$  from the observations  $(\tilde{\mathbf{Y}}_t, \{Y_{t,\mu}\}_{\mu=1}^m)$ . Note that  $R_1 \in \mathcal{S}_\beta^+(\mathbb{R})$ , so its (matrix) square  
 242 root is always uniquely defined. Recall finally the definition of the  $\star$  product in Section F.1. In the  
 243 following we will study the system of eq. (46). In order to state our results fully rigorously, we need  
 244 to add an hypothesis that can easily be relaxed:

245  $(h1^*)$  The prior  $P_0$  has bounded support.

246 Under this hypothesis,  $P_0^{(\mathbf{S})}$  is still defined by eq. (42), and we can study the system of eq. (46).  
 247 Nonetheless, this assumption *a priori* rules out a Gaussian prior for  $P_0$ , and thus the correspondence  
 248 between the system of eq. (46) and our original model. However, following the arguments of [9],  
 249 hypothesis  $(h1^*)$  can very easily be relaxed to the existence of the second moment of  $P_0$ , which is then  
 250 consistent with a Gaussian prior. In the following, we will thus work under hypothesis  $(h1)$ , but we will  
 251 sometimes as well use hypothesis  $(h1^*)$  without loss of generality. We define  $u_y(z) \equiv \ln P_{\text{out}}(y|z)$ ,  
 252 and

$$S_{t,\mu} \equiv \sqrt{\frac{1-t}{n}} [\mathbf{WZ}^*]_\mu + \sqrt{R_2(t, \epsilon)} V_\mu + \sqrt{Q_z t - R_2(t, \epsilon) + 2s_n A_\mu^*}, \quad (47)$$

$$s_{t,\mu} \equiv \sqrt{\frac{1-t}{n}} [\mathbf{Wz}]_\mu + \sqrt{R_2(t, \epsilon)} V_\mu + \sqrt{Q_z t - R_2(t, \epsilon) + 2s_n a_\mu}. \quad (48)$$

253 The posterior distribution in this model can then be written as:

$$\mathbb{P}_{n,t,\epsilon}(\mathbf{z}, \mathbf{a} | \mathbf{Y}_t, \tilde{\mathbf{Y}}_t) d\mathbf{z} d\mathbf{a} \equiv \frac{1}{\mathcal{Z}_{n,t,\epsilon}(\mathbf{Y}_t, \tilde{\mathbf{Y}}_t)} P_0^{(\mathbf{S})}(d\mathbf{z}) \mathcal{D}_\beta \mathbf{a} e^{-\mathcal{H}_{t,\epsilon}(\mathbf{z}, \mathbf{a}; \mathbf{Y}_t, \tilde{\mathbf{Y}}_t, \mathbf{W}, \mathbf{V})}. \quad (49)$$

254 To keep the notations lighter we omitted the conditioning on the variables  $\mathbf{V}, \mathbf{W}$  which are assumed  
 255 to be known. We defined the Hamiltonian:

$$\mathcal{H}_{t,\epsilon}(\mathbf{z}, \mathbf{a}; \mathbf{Y}_t, \tilde{\mathbf{Y}}_t, \mathbf{W}, \mathbf{V}) \equiv - \sum_{\mu=1}^m u_{Y_{t,\mu}}(s_{t,\mu}) + \frac{\beta}{2} \sum_{k=1}^p \left| \tilde{Y}_{t,k} - (R_1(t, \epsilon))^{1/2} \star z_k \right|^2. \quad (50)$$

256 For any  $t \in (0, 1)$ , we define the free entropy (the expectation is over all “quenched” variables,  
 257 including  $\mathbf{S}$  if it is random):

$$f_{n,\epsilon}(t) \equiv \frac{1}{n} \mathbb{E} \ln \mathcal{Z}_{n,t,\epsilon}(\mathbf{Y}_t, \tilde{\mathbf{Y}}_t).$$

258 The following lemma gives the  $t = 0$  and  $t = 1$  limits of the free entropy:

**Lemma D.3.**  $f_{n,\epsilon}(t)$  admits the following limit values for  $t \in \{0, 1\}$ :

$$\begin{cases} f_{n,\epsilon}(0) = f_n - \frac{\beta\delta}{2} + \mathcal{O}_n(1), \\ f_{n,\epsilon}(1) = \Psi_0^{(\nu)} \left( \int_0^1 r_\epsilon(t) dt \right) - \frac{\beta}{2} \left[ \delta + \mathbb{E}_{\nu_B}[X] \int_0^1 r_\epsilon(t) dt \right] + \alpha \Psi_{\text{out}} \left( \int_0^1 q_\epsilon(t) dt \right) + \mathcal{O}_n(1). \end{cases}$$

259 *Proof of Lemma D.3.* Using Lemma 5.1 of [11], there exists a constant  $C > 0$  such that for all  
 260  $\epsilon \in \mathcal{D}_n^\beta \times [s_n, 2s_n]$ , one has  $|f_{n,\epsilon}(0) - f_{n,(0,0)}(0)| \leq C s_n$ . The proof of the value of  $f_{n,\epsilon}(0)$  is then  
 261 straightforwardly done by plugging  $t = 0$  into the definition of  $f_{n,\epsilon}$ . At  $t = 1$ , the interpolation  
 262 channels of eq. (46) decouple, and we have:

$$\begin{aligned} f_{n,\epsilon}(1) &= \frac{1}{n} \mathbb{E} \ln \int_{\mathbb{K}^p} P_0^{(\mathbf{S})}(d\mathbf{z}) \exp \left\{ - \frac{\beta}{2} \sum_{k=1}^p \left| \tilde{Y}_{1,k} - \left( \epsilon_1 + \int_0^1 r_\epsilon(t) \mathbb{1}_\beta dt \right)^{1/2} \star z_k \right|^2 \right\} \\ &+ \frac{m}{n} \mathbb{E}_{Y_1, \mathbf{V}} \ln P_{\text{out}} \left( Y_1 \left| \left( \epsilon_2 + \int_0^1 q_\epsilon(t) dt \right)^{1/2} V + \left( Q_z + 2s_n - \epsilon_2 - \int_0^1 q_\epsilon(t) dt \right)^{1/2} a \right. \right), \\ &= \frac{1}{n} \sum_{i=1}^{\min(n,p)} \int_{\mathbb{K}} dY \mathcal{D}_\beta X \frac{e^{-\frac{\beta}{2}|Y - S_i(R_1(1,\epsilon))^{1/2} \star X|^2}}{(2\pi/\beta)^{\beta/2}} \ln \left\{ \int \mathcal{D}_\beta x e^{-\frac{\beta}{2}|Y - S_i(R_1(1,\epsilon))^{1/2} \star x|^2} \right\} \\ &+ \frac{1}{n} \sum_{i=\min(n,p)+1}^p \int_{\mathbb{K}} dY \frac{e^{-\frac{\beta}{2}|Y|^2}}{(2\pi/\beta)^{\beta/2}} \ln \left\{ e^{-\frac{\beta}{2}|Y|^2} \right\} \right\} + \alpha \Psi_{\text{out}} \left( \int_0^1 q_\epsilon(t) dt \right) + \mathcal{O}_n(1). \end{aligned}$$

263 Recall that  $R_1(1, \epsilon) = (\int_0^1 r_\epsilon(t) dt) \mathbb{1}_\beta + \mathcal{O}_n(1)$ , so that up to  $\mathcal{O}_n(1)$  terms the Gaussian integration  
 264 on  $X, x$  can be performed, which yields a Gaussian integration on  $Y$ , and we reach in the end:

$$f_{n,\epsilon}(1) = -\frac{\beta p}{2n} - \frac{\beta}{2n} \sum_{i=1}^{\min(n,p)} \ln \left( 1 + S_i^2 \int_0^1 r_\epsilon(t) dt \right) + \alpha \Psi_{\text{out}} \left( \int_0^1 q_\epsilon(t) dt \right) + \mathcal{O}_n(1).$$

265 Recall that  $\nu_B$  is defined as the asymptotic eigenvalue distribution of  $\mathbf{S}^\top \mathbf{S}$ . By (h3) we have:

$$f_{n,\epsilon}(1) = \Psi_0^{(\nu)} \left( \int_0^1 r_\epsilon(t) dt \right) - \frac{\beta}{2} \left[ \delta + \mathbb{E}_{\nu_B}[X] \int_0^1 r_\epsilon(t) dt \right] + \alpha \Psi_{\text{out}} \left( \int_0^1 q_\epsilon(t) dt \right) + \mathcal{O}_n(1).$$

266 which is what we wanted to show.  $\square$

## 267 D.2 Free entropy variation

268 Lemma D.3 gives a way to compute the free entropy  $f_n$  by the fundamental theorem of analysis:

$$f_n = f_{n,\epsilon}(0) + \frac{\beta \delta}{2} + \mathcal{O}_n(1) = \frac{\beta \delta}{2} + f_{n,\epsilon}(1) - \int_0^1 f'_{n,\epsilon}(t) dt. \quad (52)$$

We define the *overlap*  $Q$  and the *overlap matrix*  $Q^{(M)}$  as

$$\begin{cases} Q \equiv \frac{1}{p} (\mathbf{Z}^*)^\top \mathbf{z}, & Q^{(M)} \equiv Q & \text{if } \beta = 1, \quad (53a) \\ Q \equiv \frac{1}{p} (\mathbf{Z}^*)^\dagger \mathbf{z}, & Q^{(M)} \equiv \frac{1}{p} \begin{pmatrix} \text{Re}[\mathbf{Z}^*]^\top \text{Re}[\mathbf{z}] & \text{Re}[\mathbf{Z}^*]^\top \text{Im}[\mathbf{z}] \\ \text{Im}[\mathbf{Z}^*]^\top \text{Re}[\mathbf{z}] & \text{Im}[\mathbf{Z}^*]^\top \text{Im}[\mathbf{z}] \end{pmatrix} & \text{if } \beta = 2. \quad (53b) \end{cases}$$

269 Note that  $Q \in \mathbb{K}$ ,  $Q^{(M)} \in \mathcal{S}_\beta(\mathbb{R})$  for  $\beta = 1, 2$ , and that  $\text{Re}[Q] = \text{Tr}_\beta[Q^{(M)}]$ . Finally, the Gibbs  
 270 bracket  $\langle \cdot \rangle_{n,t,\epsilon}$  is defined as the average over the posterior distribution of eq. (49). Recall that  
 271  $u_y(z) \equiv \ln P_{\text{out}}(y|z)$ . We can now state our identity for  $f'_{n,\epsilon}(t)$ , a counterpart to Proposition 3 of [9]  
 272 and Proposition 5.2 of [11]:

273 **Lemma D.4** (Free entropy variation). *For all  $t \in (0, 1)$  and  $\epsilon \in \mathcal{D}_n^\beta \times [s_n, 2s_n]$ :*

$$\begin{aligned} f'_{n,\epsilon}(t) &= -\frac{1}{2\beta} \mathbb{E} \left\langle \left( \frac{1}{n} \sum_{\mu=1}^m u'_{Y_{t,\mu}}(S_{t,\mu})^\dagger u'_{Y_{t,\mu}}(s_{t,\mu}) - \beta^2 \delta r_\epsilon(t) \right) \cdot (Q - q_\epsilon(t)) \right\rangle_{n,t,\epsilon} \\ &\quad + \frac{\beta \delta r_\epsilon(t)}{2} (q_\epsilon(t) - Q_z) + \mathcal{O}_n(1), \end{aligned}$$

274 in which  $\mathcal{O}_n(1)$  is uniform in  $t, \epsilon, q_\epsilon, r_\epsilon$ .

275 *Proof of Lemma D.4.* The proof is done in two steps. First, we show the following:

$$\begin{aligned} f'_{n,\epsilon}(t) &= -\frac{\beta \delta r_\epsilon(t)}{2} (Q_z - q_\epsilon(t)) + \frac{1}{2n\beta} \sum_{\mu=1}^m \mathbb{E} \left[ \left( Q_z - \frac{\|\mathbf{Z}^*\|^2}{p} \right) \frac{\Delta P_{\text{out}}(Y_{t,\mu}|S_{t,\mu})}{P_{\text{out}}(Y_{t,\mu}|S_{t,\mu})} \ln \mathcal{Z} \right] \quad (54) \\ &\quad + \frac{1}{2\beta} \mathbb{E} \left\langle \left( \frac{1}{n} \sum_{\mu=1}^m u'_{Y_{t,\mu}}(S_{t,\mu})^\dagger u'_{Y_{t,\mu}}(s_{t,\mu}) - \beta^2 \delta r_\epsilon(t) \right) \cdot (q_\epsilon(t) - Q) \right\rangle_{n,t,\epsilon}. \end{aligned}$$

276 We will then build on this result by using the concentration of the free entropy of the interpolated  
 277 model, cf. Theorem D.5 (which is independent of Lemma D.4). From the definition of  $f_{n,\epsilon}(t)$ , we  
 278 have (denoting  $\mathcal{Z} \equiv \mathcal{Z}_{n,t,\epsilon}(\mathbf{Y}_t, \tilde{\mathbf{Y}}_t)$  to lighten the notations):

$$f'_{n,\epsilon}(t) = -\frac{1}{n} \mathbb{E} [\partial_t \mathcal{H}_{t,\epsilon}(\mathbf{Z}^*, \mathbf{A}^*; \mathbf{Y}_t, \tilde{\mathbf{Y}}_t, \mathbf{W}, \mathbf{V}) \ln \mathcal{Z}] - \frac{1}{n} \mathbb{E} \langle \partial_t \mathcal{H}_{t,\epsilon}(\mathbf{z}, \mathbf{a}; \mathbf{Y}_t, \tilde{\mathbf{Y}}_t, \mathbf{W}, \mathbf{V}) \rangle_{n,t,\epsilon}. \quad (55)$$

279 The definition of  $\mathcal{H}$  in eq. (50) gives, up to  $\mathcal{O}_n(1)$  terms<sup>1</sup>:

$$\partial_t \mathcal{H}_{t,\epsilon}(\mathbf{Z}^*, \mathbf{A}^*; \mathbf{Y}_t, \tilde{\mathbf{Y}}_t, \mathbf{W}, \mathbf{V}) = -\frac{\beta r_\epsilon(t)}{2 \sqrt{\int_0^t r_\epsilon(u) du}} \sum_{k=1}^p Z_k^* \cdot \zeta_k + \sum_{\mu=1}^m \partial_t S_{t,\mu} \cdot u'_{Y_{t,\mu}}(S_{t,\mu}). \quad (56)$$

<sup>1</sup>Our conventions for derivatives of real functions of complex variables are reminded in Section F.2.

280 By Proposition F.1 (the Nishimori identity), we have:

$$\begin{aligned}\mathbb{E}\langle \partial_t \mathcal{H}_{t,\epsilon}(\mathbf{z}, \mathbf{a}; \mathbf{Y}_t, \tilde{\mathbf{Y}}_t, \mathbf{W}, \mathbf{V}) \rangle_{n,t,\epsilon} &= \mathbb{E}[\partial_t \mathcal{H}_{t,\epsilon}(\mathbf{Z}^*, \mathbf{A}^*; \mathbf{Y}_t, \tilde{\mathbf{Y}}_t, \mathbf{W}, \mathbf{V})], \\ &= \mathbb{E}\left[\sum_{\mu=1}^m \partial_t S_{t,\mu} \cdot \frac{P'_{\text{out}}(Y_{t,\mu}|S_{t,\mu})}{P_{\text{out}}(Y_{t,\mu}|S_{t,\mu})}\right] + \mathcal{O}_n(1) = \mathcal{O}_n(1),\end{aligned}$$

281 as can be seen from eq. (56). The first term of eq. (55) can be written (up to  $\mathcal{O}_n(1)$  terms) as the sum  
282 of four contributions that we will compute successively, using Stein's lemma (see eqs. (87),(88)). We  
283 start with the first one:

$$\begin{aligned}\frac{\beta r_\epsilon(t)}{2n\sqrt{\int_0^t r_\epsilon(u)du}} \sum_{k=1}^p \mathbb{E}[Z_k^* \cdot \zeta_k \ln \mathcal{Z}] &= \frac{r_\epsilon(t)}{2n\sqrt{\int_0^t r_\epsilon(u)du}} \sum_{k=1}^p \mathbb{E}\left[Z_k^* \cdot \frac{d}{d\zeta_k} \ln \mathcal{Z}\right], \\ &= \frac{-\beta r_\epsilon(t)}{2n\sqrt{\int_0^t r_\epsilon(u)du}} \sum_{k=1}^p \mathbb{E}[Z_k^* \cdot \langle R_1(t, \epsilon)^{1/2} \star (Z_k^* - z_k) + \zeta_k \rangle_{n,t,\epsilon}], \\ &= \frac{-\beta r_\epsilon(t)}{2n} \sum_{k=1}^p \mathbb{E}[|Z_k^*|^2 - Z_k^* \cdot \langle z_k \rangle_{n,t,\epsilon}] + \mathcal{O}_n(1) \\ &= \frac{-\beta \delta r_\epsilon(t)}{2} (Q_z - \mathbb{E}[\langle Q \rangle_{n,t,\epsilon}]) + \mathcal{O}_n(1).\end{aligned}\quad (57)$$

284 We used the Nishimori identity Proposition F.1 in the last equation. We now turn to the second term,  
285 and in a similar way we reach, by integration by parts with respect to  $\mathbf{W}$  (recall the definition of the  
286 Laplace operator in eq. (85)):

$$\begin{aligned}\frac{1}{\sqrt{p(1-t)}} \sum_{\mu=1}^m \mathbb{E}\left[\langle \mathbf{W}\mathbf{Z}^* \rangle_\mu \cdot u'_{Y_{t,\mu}}(S_{t,\mu}) \ln \mathcal{Z}\right] \\ &= \frac{1}{\beta} \sum_{\mu=1}^m \mathbb{E}\left[\frac{\|\mathbf{Z}^*\|^2}{p} (\Delta u_{Y_{t,\mu}}(S_{t,\mu}) + |u'_{Y_{t,\mu}}(S_{t,\mu})|^2) \ln \mathcal{Z}\right. \\ &\quad \left. + \left\langle (u'_{Y_{t,\mu}}(S_{t,\mu}))^\dagger u'_{Y_{t,\mu}}(S_{t,\mu}) \cdot \left[\frac{(\mathbf{Z}^*)^\dagger \mathbf{z}}{p}\right] \right\rangle_{n,t,\epsilon}\right], \\ &= \frac{1}{\beta} \sum_{\mu=1}^m \mathbb{E}\left[\frac{\|\mathbf{Z}^*\|^2}{p} \frac{\Delta P_{\text{out}}(Y_{t,\mu}|S_{t,\mu})}{P_{\text{out}}(Y_{t,\mu}|S_{t,\mu})} \ln \mathcal{Z} + \left\langle (u'_{Y_{t,\mu}}(S_{t,\mu}))^\dagger u'_{Y_{t,\mu}}(S_{t,\mu}) \cdot \left[\frac{(\mathbf{Z}^*)^\dagger \mathbf{z}}{p}\right] \right\rangle_{n,t,\epsilon}\right].\end{aligned}$$

287 We used in the last equation that  $\Delta u_y(x) + |u'_y(x)|^2 = \Delta P_{\text{out}}(y|x)/P_{\text{out}}(y|x)$ . Integrating by parts  
288 with respect to  $V_\mu, A_\mu^*$ , we obtain in a similar way:

$$\begin{aligned}\mathbb{E} \sum_{\mu=1}^m \left[ \frac{q_\epsilon(t) V_\mu}{\sqrt{R_2(t, \epsilon)}} + \frac{(Q_z - q_\epsilon(t)) A_\mu^*}{\sqrt{Q_z t - R_2(t, \epsilon) + 2s_n}} \right] \cdot u'_{Y_{t,\mu}}(S_{t,\mu}) \ln \mathcal{Z} \\ = \frac{1}{\beta} \sum_{\mu=1}^m \mathbb{E} \left[ Q_z \frac{\Delta P_{\text{out}}(Y_{t,\mu}|S_{t,\mu})}{P_{\text{out}}(Y_{t,\mu}|S_{t,\mu})} \ln \mathcal{Z} + q_\epsilon(t) \langle u'_{Y_{t,\mu}}(S_{t,\mu}) \cdot u'_{Y_{t,\mu}}(S_{t,\mu}) \rangle_{n,t,\epsilon} \right].\end{aligned}$$

289 By using the Nishimori identity, we obtain after summing all the previous terms the sought eq. (54):

$$\begin{aligned}f'_{n,\epsilon}(t) &= -\frac{\beta \delta r_\epsilon(t)}{2} (Q_z - q_\epsilon(t)) + \frac{1}{2n\beta} \sum_{\mu=1}^m \mathbb{E} \left[ \left( Q_z - \frac{\|\mathbf{Z}^*\|^2}{p} \right) \frac{\Delta P_{\text{out}}(Y_{t,\mu}|S_{t,\mu})}{P_{\text{out}}(Y_{t,\mu}|S_{t,\mu})} \ln \mathcal{Z} \right] \\ &\quad + \frac{1}{2\beta} \mathbb{E} \left\langle \left( \frac{1}{n} \sum_{\mu=1}^m u'_{Y_{t,\mu}}(S_{t,\mu})^\dagger u'_{Y_{t,\mu}}(S_{t,\mu}) - \beta^2 \delta r_\epsilon(t) \right) \cdot (q_\epsilon(t) - Q) \right\rangle_{n,t,\epsilon}.\end{aligned}$$

290 To finish the proof, we must therefore just show that  $\lim_{n \rightarrow \infty} B_n = 0$  uniformly in  $t, \epsilon, q_\epsilon, r_\epsilon$ , with

$$B_n \equiv \frac{1}{n} \sum_{\mu=1}^m \mathbb{E} \left[ \left( Q_z - \frac{\|\mathbf{Z}^*\|^2}{p} \right) \frac{\Delta P_{\text{out}}(Y_{t,\mu}|S_{t,\mu})}{P_{\text{out}}(Y_{t,\mu}|S_{t,\mu})} \ln \mathcal{Z} \right].$$

291 First, note that

$$\mathbb{E}\left[\left(Q_z - \frac{\|\mathbf{Z}^*\|^2}{p}\right) \frac{\Delta P_{\text{out}}(Y_{t,\mu}|S_{t,\mu})}{P_{\text{out}}(Y_{t,\mu}|S_{t,\mu})}\right] = \mathbb{E}\left[\left(Q_z - \frac{\|\mathbf{Z}^*\|^2}{p}\right) \mathbb{E}\left[\frac{\Delta P_{\text{out}}(Y_{t,\mu}|S_{t,\mu})}{P_{\text{out}}(Y_{t,\mu}|S_{t,\mu})} \middle| \mathbf{Z}^*, \mathbf{S}_t\right]\right] = 0,$$

292 since  $\int dY \nabla P_{\text{out}}(Y|S) = 0$ . Using this, we can write

$$B_n = \frac{1}{n} \sum_{\mu=1}^m \mathbb{E}\left[\left(Q_z - \frac{\|\mathbf{Z}^*\|^2}{p}\right) \frac{\Delta P_{\text{out}}(Y_{t,\mu}|S_{t,\mu})}{P_{\text{out}}(Y_{t,\mu}|S_{t,\mu})} (\ln \mathcal{Z} - f_{n,\epsilon}(t))\right]. \quad (58)$$

293 We then follow exactly the lines of Appendix A.5.2 of [9], let us recall its main steps. Starting from  
 294 eq. (58), one uses the Cauchy-Schwarz inequality alongside Theorem D.5 (which is independent of  
 295 Lemma D.4), that gives  $\mathbb{E}[(\ln \mathcal{Z}/n - f_{n,\epsilon}(t))^2] \rightarrow 0$  uniformly in  $t$ . The expectation of the square of  
 296 the other terms in eq. (58) can easily be bounded using hypotheses  $(H0), (h1^*), (h3)$ , uniformly in  $t$ .  
 297 Combining these bounds then shows that  $B_n \rightarrow 0$  uniformly in  $t$ , which finishes the proof.  $\square$

### 298 D.3 Concentration of the free entropy and the overlap

299 We denote the mean over  $\epsilon$  as:

$$\mathbb{E}_\epsilon[\cdot] \equiv \frac{1}{s_n \text{Vol}(\mathcal{D}_n^\beta)} \int_{\mathcal{D}_n^\beta} d\epsilon_1 \int_0^1 d\epsilon_2[\cdot].$$

300 In [9, 11, 12], the authors give a quite technical proof of the concentration of the free entropy and the  
 301 overlap of an interpolated system close to the one described in Section D.1. We present here two  
 302 results of this type. The first one concerns the concentration of the free entropy of the interpolated  
 303 system<sup>1</sup>. It is very similar to Theorem 6 of [9].

304 **Theorem D.5** (Free entropy concentration). *Under the assumptions of Theorem 2.2, there exists a*  
 305 *constant  $C > 0$  that does not depend on  $n, t, \epsilon$  and such that for all  $n, t, \epsilon, q_\epsilon, r_\epsilon$ :*

$$\mathbb{E}\left[\left(\frac{1}{n} \ln \mathcal{Z}_{n,t,\epsilon}(\mathbf{Y}_t, \tilde{\mathbf{Y}}_t) - \frac{1}{n} \mathbb{E} \ln \mathcal{Z}_{n,t,\epsilon}(\mathbf{Y}_t, \tilde{\mathbf{Y}}_t)\right)^2\right] \leq \frac{C}{n}.$$

306 Our second theorem concerns the concentration of the overlap. It will follow as an almost immediate  
 307 consequence of a result of [12]. Before stating it, we introduce a regularity notion for our interpolation  
 308 functions of eq. (45):

309 **Definition D.6** (Regularity). *The families of functions  $(q_\epsilon), (r_\epsilon)$  for  $\epsilon \in \mathcal{D}_n^\beta \times [s_n, 2s_n]$  are said to be*  
 310 *regular if there exists  $\gamma > 0$  such that for all  $t \in [0, 1]$  the mapping  $\epsilon \mapsto R(t, \epsilon) \equiv (R_1(t, \epsilon), R_2(t, \epsilon))$*   
 311 *is a  $\mathcal{C}^1$  diffeomorphism whose Jacobian  $J_{n,\epsilon}(t)$  satisfies  $J_{n,\epsilon}(t) \geq \gamma$  for all  $t \in [0, 1]$  and all  $\epsilon$ .*

312 We can now state our theorem on the concentration of the overlap  $Q$ :

313 **Theorem D.7** (Overlap concentration). *Under  $(H0), (h1^*), (h2), (h3)$ , and if the functions  $(q_\epsilon, r_\epsilon)$  are*  
 314 *regular (cf. Definition D.6), then there exists a sequence  $s_n$  going to 0 (arbitrarily slowly) such that*

$$\mathbb{E}_\epsilon \int_0^1 dt \mathbb{E}\langle |Q - \mathbb{E}\langle Q \rangle_{n,t,\epsilon}|^2 \rangle_{n,t,\epsilon} = \mathcal{O}_n(1),$$

315 with  $\mathcal{O}_n(1)$  uniform in the choice of  $r_\epsilon, q_\epsilon$ .

316 The rest of this section is dedicated to the proofs of Theorem D.5 and Theorem D.7.

#### 317 D.3.1 Proof of Theorem D.5

318 The proof described in Section E.1 of [9] can be adapted verbatim in this setting. It relies on two  
 319 concentration inequalities [13], that we recall here in the complex and real settings.

320 **Proposition D.8** (Gaussian Poincaré inequality). *Let  $\mathbf{U} \in \mathbb{K}^n$  be distributed according to  $\mathcal{N}_\beta(0, \mathbb{1}_n)$ ,*  
 321 *and  $g : \mathbb{K}^n \rightarrow \mathbb{R}$  a  $\mathcal{C}^1$  function. Recall our conventions for derivatives, see Section F.2. Then*

$$\mathbb{E}[g(\mathbf{U})^2] - \mathbb{E}[g(\mathbf{U})]^2 \leq \frac{1}{\beta} \mathbb{E}[\|\nabla g(\mathbf{U})\|^2].$$

<sup>1</sup>Recall the definition of  $\mathcal{Z}_{n,t,\epsilon}$  in eq. (49).

322 **Proposition D.9** (Bounded differences inequality). *Let  $\mathcal{B} \subset \mathbb{K}$ , and  $g : \mathcal{B}^n \rightarrow \mathbb{R}$  a function such*  
 323 *that there exists  $c_1, \dots, c_n \geq 0$  that satisfy for all  $i \in \{1, \dots, n\}$ :*

$$\sup_{\substack{u_1, \dots, u_n \in \mathcal{B}^n \\ u'_i \in \mathcal{B}}} |g(u_1, \dots, u_i, \dots, u_n) - g(u_1, \dots, u_{i-1}, u'_i, u_{i+1}, \dots, u_n)| \leq c_i.$$

324 *Then if  $\mathbf{U} \in \mathbb{K}^n$  is a random vector of independent random variables with value in  $\mathcal{B}$ , we have:*

$$\mathbb{E}[g(\mathbf{U})^2] - \mathbb{E}[g(\mathbf{U})]^2 \leq \frac{\beta}{4} \sum_{i=1}^n c_i^2.$$

325 Proposition D.8 is used to show the concentration of  $(\ln \mathcal{Z}_{n,t,\epsilon})/n$  with respect to the Gaussian  
 326 variables  $\zeta, \mathbf{W}, \mathbf{A}^*, \mathbf{V}$ , while Proposition D.9 is used to show the concentration with respect to  $\mathbf{Z}^*$ .  
 327 Using this strategy, the proof of [9] is directly transposed here, and we do not repeat it.

### 328 D.3.2 Proof of Theorem D.7

329 We start with a lemma on the average value of  $Q^{(M)}$  under  $\mathbb{E}\langle \cdot \rangle$ , in the complex case.

**Lemma D.10.** *Assume  $\beta = 2$ . Then*

$$\begin{cases} \mathbb{E}\langle Q_{12}^{(M)} \rangle_{n,t,\epsilon} = \mathbb{E}\langle Q_{21}^{(M)} \rangle_{n,t,\epsilon} = \mathcal{O}_n(1), \\ \mathbb{E}\langle Q_{11}^{(M)} \rangle_{n,t,\epsilon} - \mathbb{E}\langle Q_{22}^{(M)} \rangle_{n,t,\epsilon} = \mathcal{O}_n(1), \end{cases}$$

330 *in which  $\mathcal{O}_n(1)$  is uniform in  $t, \epsilon, q_\epsilon, r_\epsilon$ .*

*Proof of Lemma D.10.* By the classical theorems of continuity and derivability under the integral sign, it is easy to see that  $\mathbb{E}\langle Q^{(M)} \rangle_{n,t,\epsilon}$  is a continuous function of  $(R_1, R_2)$ , and moreover that it admits a Lipschitz constant  $K > 0$ , independent of  $t, \epsilon, q_\epsilon, r_\epsilon$ . Indeed, thanks to hypotheses (H0),(h1\*), (h2),(h3), the domination hypotheses of these theorems are satisfied, and one can easily bound the differential of  $\mathbb{E}\langle Q \rangle$  to obtain the existence of the Lipschitz constant  $K > 0$ . Moreover, for  $\epsilon_1 = 0, \epsilon_2 = 0$ , it is easy to check by the Nishimori identity Proposition F.1 that we have:

$$\begin{cases} \mathbb{E}\langle Q_{12}^{(M)} \rangle_{n,t,\epsilon} = \mathbb{E}\langle Q_{21}^{(M)} \rangle_{n,t,\epsilon} = 0, \\ \mathbb{E}\langle Q_{11}^{(M)} \rangle_{n,t,\epsilon} = \mathbb{E}\langle Q_{22}^{(M)} \rangle_{n,t,\epsilon}. \end{cases}$$

331 Using the Lipschitz constant  $K > 0$  (which does not depend on the parameters  $t, \epsilon, q_\epsilon, r_\epsilon$ ) and the  
 332 fact that  $\epsilon_1, \epsilon_2 = \mathcal{O}(s_n) = \mathcal{O}_n(1)$ , this ends the proof.  $\square$

333 Moreover, once averaged over  $\epsilon_2 \in [s_n, 2s_n]$  and  $t \in (0, 1)$ , and using the concentration of the free  
 334 entropy (Theorem D.5), the results of [12] imply the thermal and total concentration of the overlap  
 335 matrix  $Q^{(M)}$  defined in eq. (53):

**Lemma D.11.** *Assuming that  $(q_\epsilon, r_\epsilon)$  are regular, there exists a sequence  $s_n \rightarrow 0$  (slowly enough) and  $\eta, C > 0$  such that (with  $\|\cdot\|_F$  the Frobenius norm):*

$$\begin{cases} \mathbb{E}_\epsilon \int_0^1 dt \mathbb{E}\langle \|Q^{(M)} - \langle Q^{(M)} \rangle_{n,t,\epsilon}\|_F^2 \rangle_{n,t,\epsilon} \leq \frac{C}{n^\eta}, \\ \mathbb{E}_\epsilon \int_0^1 dt \mathbb{E}\langle \|Q^{(M)} - \mathbb{E}\langle Q^{(M)} \rangle_{n,t,\epsilon}\|_F^2 \rangle_{n,t,\epsilon} \leq \frac{C}{n^\eta}. \end{cases}$$

336 *Proof of Lemma D.11.* We can use the results of [12], under two conditions: (i) the concentration  
 337 of the free entropy, which is given here by Theorem D.5, and (ii) the regularity of  $(q_\epsilon, r_\epsilon)$ . Indeed,  
 338 the results of [9] give the concentration results as integrated over the matrix  $R_1(t, \epsilon)$ . Using the  
 339 regularity assumption, we can lower bound these integrals by integrals over the perturbation matrix  
 340  $\epsilon_1$  (up to a multiplicative constant, which is uniform in all the relevant parameters), which then yields  
 341 Lemma D.11. This argument was also made in a very close setting in [9, 11].  $\square$

342 Using Lemma D.10 (if  $\beta = 1$  this lemma is not needed) alongside Lemma D.11 yields Theorem D.7,  
 343 since  $Q = \text{Tr}_\beta[Q^{(M)}]$ .



344 **D.4 Upper and lower bounds**

345 **Proposition D.12** (Fundamental sum rule). *Assume that  $(q_\epsilon, r_\epsilon)$  are regular (cf Definition D.6), and*  
 346 *that for all  $\epsilon \in \mathcal{D}_n^\beta \times [s_n, 2s_n]$  and  $t \in (0, 1)$  we have  $q_\epsilon(t) = \text{Tr}_\beta[\mathbb{E}\langle Q^{(M)} \rangle_{n,t,\epsilon}]$ . Then:*

$$f_n = \mathbb{E}_\epsilon \left[ \Psi_0^{(\nu)} \left( \int_0^1 r_\epsilon(t) dt \right) + \alpha \Psi_{\text{out}} \left( \int_0^1 q_\epsilon(t) dt \right) - \frac{\beta\delta}{2} \int_0^1 q_\epsilon(t) r_\epsilon(t) dt \right] + \mathcal{O}_n(1),$$

347 *in which  $\mathcal{O}_n(1)$  is uniform in the choice of  $q_\epsilon, r_\epsilon$ .*

348 *Proof of Proposition D.12.* The proof is based on Lemma D.3 and Lemma D.4. Replacing their  
 349 results into eq (52), in order to finish the proof, we only need to show that  $\lim_{n \rightarrow \infty} \Gamma_n = 0$   
 350 (uniformly in  $r_\epsilon, q_\epsilon$ ), with

$$\Gamma_n \equiv \left( \mathbb{E}_\epsilon \int_0^1 dt \mathbb{E} \left\langle \left( \frac{1}{n} \sum_{\mu=1}^m u'_{Y_{t,\mu}}(S_{t,\mu})^\dagger u'_{Y_{t,\mu}}(s_{t,\mu}) - \beta^2 \delta r_\epsilon(t) \right) \cdot (q_\epsilon(t) - Q) \right\rangle_{n,t,\epsilon} \right)^2.$$

351 By the Cauchy-Schwarz inequality, we can bound:

$$\begin{aligned} \Gamma_n &\leq \mathbb{E}_\epsilon \int_0^1 dt \mathbb{E} \left\langle \left| \frac{1}{n} \sum_{\mu=1}^m u'_{Y_{t,\mu}}(S_{t,\mu})^\dagger u'_{Y_{t,\mu}}(s_{t,\mu}) - \beta^2 \delta r_\epsilon(t) \right|^2 \right\rangle_{n,t,\epsilon} \\ &\quad \times \mathbb{E}_\epsilon \int_0^1 dt \mathbb{E} \langle |Q - q_\epsilon(t)|^2 \rangle_{n,t,\epsilon}. \end{aligned}$$

352 The first term is bounded by a constant  $C > 0$  by Lemma F.2 (recall that  $r_\epsilon(t)$  is bounded as well  
 353 by  $r_{\text{max}}$ ). By Theorem D.7, the second term is  $\mathcal{O}_n(1)$ , uniformly in  $q_\epsilon, r_\epsilon$ , since we assumed that  
 354  $q_\epsilon(t) = \text{Tr}_\beta[\mathbb{E}\langle Q \rangle]$ . As the vanishing terms are uniform in  $q_\epsilon, r_\epsilon$ , this shows that  $\lim_{n \rightarrow \infty} \Gamma_n = 0$ ,  
 355 which ends the proof.  $\square$

356 Before obtaining the two bounds from the fundamental sum rule, we need a final preparatory lemma,  
 357 that will imply the regularity of the functions  $(q_\epsilon, r_\epsilon)$  that we will chose to derive the bounds.

**Lemma D.13** (Regularity). *We define  $F_n(t, R(t, \epsilon)) = (F_n^{(1)}(t, R(t, \epsilon)), F_n^{(2)}(t, R(t, \epsilon)))$ , with:*

$$\begin{cases} F_n^{(1)}(t, R(t, \epsilon)) \equiv \left( \frac{2\alpha}{\beta\delta} \Psi'_{\text{out}}(\text{Tr}_\beta[\mathbb{E}\langle Q^{(M)} \rangle_{n,t,\epsilon}] \right) \mathbb{1}_\beta, \\ F_n^{(2)}(t, R(t, \epsilon)) \equiv \text{Tr}_\beta[\mathbb{E}\langle Q^{(M)} \rangle_{n,t,\epsilon}]. \end{cases}$$

*Then  $F_n$  is a continuous function from its domain to  $\mathbb{R}^2$ . Moreover, it admits partial derivatives with respect to both  $R_1$  and  $R_2$  on the interior of its domain. We have, uniformly over the choice of  $(q_\epsilon, r_\epsilon)$ :*

$$\begin{cases} \liminf_{n \rightarrow \infty} \inf_{t \in (0,1)} \inf_{\substack{\epsilon_1 \in \mathcal{D}_n \\ \epsilon_2 \in [s_n, 2s_n]}} \sum_{l=1}^{\beta} \frac{\partial(F_n^{(1)})_{ll}}{\partial(R_1)_{ll}}(t, R(t, \epsilon)) \geq 0, \\ \frac{\partial F_n^{(2)}}{\partial R_2}(t, R(t, \epsilon)) \geq 0. \end{cases}$$

358 *Proof of Lemma D.13.* The proof is very close to the arguments of Lemma 5.5 of [11]. The continuity  
 359 and derivability follow from standard theorems of continuity and derivation under the integral sign,  
 360 thanks to hypotheses (H0),(h1\*), (h3). Indeed, under these boundedness assumptions, the domination  
 361 hypotheses of these theorems are straightforwardly satisfied. Let us start with the first inequality. We  
 362 can easily write:

$$\sum_{l=1}^{\beta} \frac{\partial(F_n^{(1)})_{ll}}{\partial(R_1)_{ll}} = \frac{2\alpha}{\beta\delta} \Psi''_{\text{out}}(\text{Tr}_\beta[\mathbb{E}\langle Q^{(M)} \rangle]) \sum_{l=1}^{\beta} \frac{\partial \text{Tr}_\beta \mathbb{E}\langle Q^{(M)} \rangle}{\partial(R_1)_{ll}}.$$

363 The convexity of  $\Psi_{\text{out}}$  was already derived so that  $\Psi_{\text{out}}'' \geq 0$ . Moreover, since  $R_1$  is the SNR matrix  
 364 of a linear channel, we know that the matrix  $\nabla_{R_1} \mathbb{E}\langle Q^{(M)} \rangle$  is positive [11]. In particular, its trace is  
 365 always positive, and by Lemma D.10:

$$\sum_{l=1}^{\beta} \frac{\partial \text{Tr}_{\beta} \mathbb{E}\langle Q^{(M)} \rangle}{\partial (R_1)_{ll}} = \underbrace{\text{Tr}_{\beta} [\nabla_{R_1} \mathbb{E}\langle Q^{(M)} \rangle]}_{\geq 0} + \mathcal{O}_n(1),$$

366 with a  $\mathcal{O}_n(1)$  uniform in  $t, \epsilon, r_{\epsilon}, q_{\epsilon}$ . This shows the first inequality. Let us sketch the argument for the  
 367 second inequality. The trace of  $Q^{(M)}$  is directly related to the MMSE on the complex vector  $\mathbf{Z}^*$  by:

$$\frac{1}{p} \text{MMSE}(\mathbf{Z}^* | \mathbf{Y}_t, \tilde{\mathbf{Y}}_t, \mathbf{V}, \mathbf{W}) = \frac{1}{p} \mathbb{E}[\|\mathbf{Z}^* - \langle \mathbf{z} \rangle\|^2] = Q_z - \text{Tr}_{\beta}[\mathbb{E}\langle Q^{(M)} \rangle].$$

368 The fact that the MMSE should decrease as the SNR  $R_2$  increases, for a channel of the type of  
 369 eq. (46a), is very natural, and it was proven in Proposition 6 of [9], which applies here. This  
 370 proposition yields that  $\text{Tr}_{\beta}[\mathbb{E}\langle Q^{(M)} \rangle]$  is a nondecreasing function of  $R_2$ , which ends the proof.  $\square$

371 Finally, we define the *replica-symmetric potential*, that appears in Proposition D.1:

$$f_{\text{RS}}(q, r) \equiv -\frac{\beta \delta r q}{2} + \Psi_0^{(\nu)}(r) + \alpha \Psi_{\text{out}}(q).$$

#### 372 D.4.1 Lower bound

373 **Proposition D.14** (Lower bound). *Under the assumptions of Theorem 2.2, the free entropy  $f_n$*   
 374 *satisfies:*

$$\liminf_{n \rightarrow \infty} f_n \geq \sup_{r \geq 0} \inf_{q \in [0, Q_z]} f_{\text{RS}}(q, r).$$

375 *Proof of Proposition D.14.* We fix  $r \geq 0$  and  $R_1(t) = \epsilon_1 + rt \mathbb{1}_{\beta}$ . We then choose  $R_2(t)$  as the  
 376 unique solution to the ordinary differential equation:

$$R_2'(t) = \text{Tr}_{\beta}[\mathbb{E}\langle Q^{(M)} \rangle_{n,t,\epsilon}], \quad (64)$$

377 with boundary condition  $R_2(0) = \epsilon_2$ . We denote this unique solution as  $R_2(t) = \epsilon_2 + \int_0^t q_{\epsilon}(r; v) dv$ .  
 378 The ODE of eq. (64) can easily be seen to satisfy the hypotheses of the parametric Cauchy-Lipschitz  
 379 theorem (as a function of the initial condition  $\epsilon_2$ ), and by the Liouville formula (cf Lemma A.3 of  
 380 [11]), the Jacobian  $J_{n,\epsilon}(t)$  of  $\epsilon \mapsto R(t, \epsilon) \equiv (R_1(t, \epsilon), R_2(t, \epsilon))$  verifies:

$$J_{n,\epsilon}(t) = \exp\left(\int_0^t \frac{\partial \text{Tr}_{\beta}[\mathbb{E}\langle Q \rangle_{n,u,\epsilon}]}{\partial R_2}(u, R(u, \epsilon)) du\right) \geq 1,$$

381 in which the inequality is a consequence of Lemma D.13. The functions are thus regular in the  
 382 sens of Definition D.6, and moreover the local inversion theorem implies that  $\epsilon \mapsto R(t, \epsilon)$  is a  
 383  $\mathcal{C}^1$  diffeomorphism. We can therefore use the fundamental sum rule Proposition D.12 as all its  
 384 hypotheses are verified. We reach:

$$\begin{aligned} f_n &= \mathbb{E}_{\epsilon} \left[ \Psi_0^{(\nu)}(r) + \alpha \Psi_{\text{out}} \left( \int_0^1 q_{\epsilon}(r; t) dt \right) - \frac{\beta \delta r}{2} \int_0^1 q_{\epsilon}(r; t) dt \right] + \mathcal{O}_n(1), \\ &= \mathbb{E}_{\epsilon} \left[ f_{\text{RS}} \left( \int_0^1 q_{\epsilon}(r; t) dt, r \right) \right] + \mathcal{O}_n(1), \\ &\geq \inf_{q \in [0, Q_z]} f_{\text{RS}}(q, r) + \mathcal{O}_n(1). \end{aligned}$$

385 Since this is true for all  $r \geq 0$  we easily obtain the sought lower bound.  $\square$

## 386 D.4.2 Upper bound

387 We now prove the final upper bound, which will end the proof of Lemma D.2.

388 **Proposition D.15** (Upper bound). *Under the assumptions of Theorem 2.2, the free entropy  $f_n$*   
 389 *satisfies:*

$$\limsup_{n \rightarrow \infty} f_n \leq \sup_{r \geq 0} \inf_{q \in [0, Q_z]} f_{\text{RS}}(q, r).$$

390 *Proof of Proposition D.15.* We will choose  $R(t, \epsilon) = (R_1(t, \epsilon), R_2(t, \epsilon))$  as the solution to the  
 391 ordinary differential equation:

$$\partial_t R_1(t, \epsilon) = \frac{2\alpha}{\beta\delta} \Psi_{\text{out}} \left[ \text{Tr}_\beta [\mathbb{E} \langle Q^{(M)} \rangle_{n,t,\epsilon}] \right] \mathbb{1}_\beta, \quad \partial_t R_2(t, \epsilon) = \text{Tr}_\beta [\mathbb{E} \langle Q^{(M)} \rangle_{n,t,\epsilon}], \quad (65)$$

392 with initial conditions  $R(0, \epsilon) = (\epsilon_1, \epsilon_2)$ . Let us denote this equation as  $\partial_t R(t) =$   
 393  $(F_{n,1}(t, R(t)), F_{n,2}(t, R(t)))$ . As in Section D.4.1, the parametric Cauchy-Lipschitz theorem implies  
 394 the existence, unicity and  $\mathcal{C}^1$  regularity of  $R(t, \epsilon)$  as a function of  $(t, \epsilon)$ . We denote this unique  
 395 solution<sup>1</sup> as  $R_1(t, \epsilon) = \epsilon_1 + \int_0^t r_\epsilon(v) dv \mathbb{1}_\beta$ ,  $R_2(t, \epsilon) = \epsilon_2 + \int_0^t q_\epsilon(v) dv$ . Again, the Liouville  
 396 formula yields that the Jacobian  $J_{n,\epsilon}(t)$  of the map  $\epsilon \mapsto R(t, \epsilon)$  is given by:

$$J_{n,\epsilon}(t) = \exp \left( \int_0^t \left\{ \sum_{l=1}^{\beta} \frac{\partial(F_{n,1})_{ll}}{\partial(R_1)_{ll}}(s, R(s, \epsilon)) + \frac{\partial F_{n,2}}{\partial R_2}(s, R(s, \epsilon)) \right\} ds \right). \quad (66)$$

397 Then, by Lemma D.13, we have that  $\liminf_{n \rightarrow \infty} \inf_t \inf_\epsilon J_{n,\epsilon}(t) \geq 1$ . In particular, this implies that  
 398  $(q_\epsilon, r_\epsilon)$  are regular in the sense of Definition D.6. We have all that is needed to apply Proposition D.12  
 399 and we reach:

$$f_n = \mathbb{E}_\epsilon \left[ \Psi_0^{(\nu)} \left( \int_0^1 r_\epsilon(t) dt \right) + \alpha \Psi_{\text{out}} \left( \int_0^1 q_\epsilon(t) dt \right) - \frac{\beta\delta}{2} \int_0^1 q_\epsilon(t) r_\epsilon(t) dt \right] + \mathcal{O}_n(1).$$

400 Since  $\Psi_{\text{out}}$  and  $\Psi_0^{(\nu)}$  are convex, Jensen's inequality implies:

$$\begin{aligned} f_n &\leq \mathbb{E}_\epsilon \int_0^1 dt \left[ \Psi_0^{(\nu)}(r_\epsilon(t)) + \alpha \Psi_{\text{out}}(q_\epsilon(t)) - \frac{\beta\delta}{2} q_\epsilon(t) r_\epsilon(t) \right] + \mathcal{O}_n(1), \\ &\leq \mathbb{E}_\epsilon \int_0^1 dt f_{\text{RS}}(q_\epsilon(t), r_\epsilon(t)) + \mathcal{O}_n(1) \end{aligned}$$

401 Note that we have

$$f_{\text{RS}}(q_\epsilon(t), r_\epsilon(t)) = \inf_{q \in [0, Q_z]} f_{\text{RS}}(q, r_\epsilon(t)).$$

402 Indeed, the function  $q \mapsto f_{\text{RS}}(q, r_\epsilon(t))$  is convex, and its derivative is zero for  $q = q_\epsilon(t)$  by definition  
 403 of  $(r_\epsilon, q_\epsilon)$ , cf eq. (65). Therefore, we have:

$$\begin{aligned} f_n &\leq \mathbb{E}_\epsilon \int_0^1 dt \inf_{q \in [0, Q_z]} f_{\text{RS}}(q, r_\epsilon(t)) + \mathcal{O}_n(1), \\ &\leq \sup_{r \geq 0} \inf_{q \in [0, Q_z]} f_{\text{RS}}(q, r_\epsilon(t)) + \mathcal{O}_n(1), \end{aligned}$$

404 which ends the proof. □

## 405 D.5 Proof of the MMSE limit

As mentioned in the main part of this work, the MMSE statement in Conjecture 2.1 is stated informally. The main reason is that obtaining the MMSE limit generically requires many technicalities, to account for the possible symmetries of the system, see e.g. Theorem 2 of [9] which performs such an analysis.

<sup>1</sup>Notice in particular that the first equation of eq. (65) implies that the derivative  $\partial_t R_1(t, \epsilon)$  is always a diagonal matrix in  $\mathcal{S}_\beta(\mathbb{R})$ .

To simplify the analysis, we “break” this symmetry by adding a side channel with an arbitrarily small signal-to-noise ratio. Formally, we consider the following inference problem made of two channels:

$$\begin{cases} Y_{t,\mu} \sim P_{\text{out}}\left(\cdot \mid \frac{1}{\sqrt{n}} \sum_{i=1}^n \Phi_{\mu i} X_i^*\right) & \mu = 1, \dots, m \\ \tilde{\mathbf{Y}}_t = \sqrt{\Lambda} \mathbf{X}^* + \mathbf{Z}', & \mathbf{Z}' \sim \mathcal{N}_\beta(0, \mathbb{1}_n), \end{cases} \quad (67a)$$

406 with  $\Lambda > 0$  (arbitrarily small). We can now state our precise statement on the MMSE:

407 **Proposition D.16.** Consider the inference problem of eq. (67), under (H0),(h1),(h2),(h3). We denote  
 408  $\langle \cdot \rangle$  the average with respect to the posterior distribution of  $\mathbf{x}$  under the problem of eq. (67). The  
 409 minimum mean squared error is achieved by the Bayes-optimal estimator  $\hat{\mathbf{X}}_{\text{opt}} = \langle \mathbf{x} \rangle$ , and it satisfies  
 410 as  $n \rightarrow \infty$ :

$$\lim_{n \rightarrow \infty} \text{MMSE} = \lim_{n \rightarrow \infty} \frac{1}{n} \mathbb{E} \|\mathbf{X}^* - \langle \mathbf{x} \rangle\|^2 = 1 - q_x^*, \quad (68)$$

411 with  $q_x^*$  the solution of the extremization problem in eq. (6), taking into account the additional side  
 412 information of eq. (67b).

413 *Proof of Proposition D.16.* With the side channel added, this proposition will follow from an appli-  
 414 cation of the classical I-MMSE theorem [14]. We denote  $\langle \cdot \rangle$  the mean under the posterior distribution  
 415 of  $\mathbf{x}$  under the channels of eq. (67), and  $\mathbb{E}$  the average with respect to the “quenched” variables  
 416  $\Phi, \mathbf{Z}', \mathbf{X}^*$ . The free entropy  $f_n(\Lambda)$  is defined as the average of the log-normalization of the posterior  
 417 distribution:

$$f_n(\Lambda) \equiv \frac{1}{n} \mathbb{E} \ln \int_{\mathbb{K}^n} P_0(d\mathbf{x}) \left[ \prod_{\mu=1}^m P_{\text{out}}\left(Y_{t,\mu} \mid \frac{1}{\sqrt{n}} \sum_{i=1}^n \Phi_{\mu i} x_i\right) \right] \frac{e^{-\frac{\beta}{2} \sum_{i=1}^n |\tilde{Y}_{t,i} - \sqrt{\Lambda} x_i|^2}}{(2\pi/\beta)^{n\beta/2}}.$$

418 We can easily replicate the adaptive interpolation analysis of Theorem 2.2 (see Section D) to this  
 419 case, and we reach the following result for the asymptotic free entropy  $f(\Lambda)$  of eq. (67):

420 **Lemma D.17.** For all  $\Lambda > 0$ , we have  $\lim_{n \rightarrow \infty} f_n(\Lambda) = f(\Lambda)$ , given by:

$$f(\Lambda) = \sup_{q_x \in [0,1]} \sup_{q_z \in [0, Q_z]} [I_0(q_x, \Lambda) + \alpha I_{\text{out}}(q_z) + I_{\text{int}}(q_x, q_z)], \quad (69)$$

421 with  $I_{\text{out}}, I_{\text{int}}$  given in Conjecture 2.1, and:

$$I_0(q_x, \Lambda) \equiv \inf_{q_x \geq 0} \left[ -\frac{\beta \hat{q}_x q_x}{2} + \int_{\mathbb{K}^2} \mathcal{D}_\beta \xi d\tilde{y} \int P_0(dx) \frac{e^{-\frac{\beta \hat{q}_x}{2} |x|^2 + \beta \sqrt{q_x} x \cdot \xi - \frac{\beta}{2} |\tilde{y} - \sqrt{\Lambda} x|^2}}{(2\pi/\beta)^{\beta/2}} \right. \\ \left. \ln \int P_0(dx) \frac{e^{-\frac{\beta \hat{q}_x}{2} |x|^2 + \beta \sqrt{q_x} x \cdot \xi - \frac{\beta}{2} |\tilde{y} - \sqrt{\Lambda} x|^2}}{(2\pi/\beta)^{\beta/2}} \right].$$

422 *Proof of Lemma D.17.* By Proposition D.1, one can simply replicate the adaptive interpolation  
 423 analysis of Section D to this model, and this will prove the required formula. The precise form of  
 424  $I_0(q_x)$  is very easy to compute.  $\square$

425 We can then use the I-MMSE formula [14], that yields that for any  $\Lambda$ ,

$$\lim_{n \rightarrow \infty} \text{MMSE} = -\frac{2}{\beta} \partial_\Lambda f(\Lambda). \quad (70)$$

426 Moreover, by Lemma D.17,  $q_x^*, \hat{q}_x^*$  is a solution of the equation:

$$q_x^* = \frac{1}{(2\pi/\beta)^{\beta/2}} \int \mathcal{D}_\beta \xi d\tilde{y} \frac{\left| \int P_0(dx) x e^{-\frac{\beta \hat{q}_x^*}{2} |x|^2 + \beta \sqrt{q_x^*} x \cdot \xi - \frac{\beta}{2} |\tilde{y} - \sqrt{\Lambda} x|^2} \right|^2}{\int P_0(dx) e^{-\frac{\beta \hat{q}_x^*}{2} |x|^2 + \beta \sqrt{q_x^*} x \cdot \xi - \frac{\beta}{2} |\tilde{y} - \sqrt{\Lambda} x|^2}}. \quad (71)$$

427 From the expression of  $I_0$  in Lemma D.17 and eq. (71), it is then a straightforward calculation to see  
 428 that  $-(2/\beta) \partial_\Lambda f(\Lambda) = 1 - q_x^*$ , which ends the proof.  $\square$

429 **D.6 Proof of Theorem 2.2: the Gaussian matrix case**

430 In this subsection, we place ourselves under  $(H0), (h'1)$  and sketch how the proof performed in the  
 431 previous sections directly extends under these hypotheses. Note that here  $\langle \lambda \rangle_\nu = \alpha$ , so  $Q_z = Q_x = \rho$ .  
 432 First, we can state a very similar result to Proposition D.1, simplifying Conjecture 2.1 in this setting:

433 **Proposition D.18.** *Under  $(H0), (h'1)$ , the replica conjecture 2.1 reduces to:*

$$\lim_{n \rightarrow \infty} \frac{1}{n} \mathbb{E} \ln \mathcal{Z}_n(\mathbf{Y}) = \sup_{\hat{q} \geq 0} \inf_{q \in [0, \rho]} \left[ -\frac{\beta q \hat{q}}{2} + \Psi_{P_0}(\hat{q}) + \alpha \Psi_{\text{out}}(q) \right].$$

434 with  $q_z, \Psi_{\text{out}}$  defined in Proposition D.1, and  $\Psi_{P_0}(\hat{q})$  defined for  $\hat{q} \geq 0$  by:

$$\Psi_{P_0}(\hat{q}) \equiv \mathbb{E}_\xi \mathcal{Z}_0(\sqrt{\hat{q}}\xi, \hat{q}) \ln \mathcal{Z}_0(\sqrt{\hat{q}}\xi, \hat{q}),$$

435 with  $\mathcal{Z}_0$  defined in eq. (7).

436 *Proof of Proposition D.18.* The proof follows similar lines to the proof of Proposition D.1, see  
 437 Section E. Let us briefly sketch the main steps. Since  $\Phi$  is Gaussian,  $\nu$  is the Marchenko-Pastur  
 438 distribution [15], and one can easily simplify  $I_{\text{int}}(q_x, q_z)$  as:

$$I_{\text{int}}(q_x, q_z) = -\frac{\alpha\beta}{2} \left[ \frac{q_x(\rho - q_z)}{2\rho(\rho - q_x)} + \ln(\rho - q_x) \right].$$

Using then the exact same sup-inf inversion arguments as in Section E, the supremum and infimum  
 over  $q_z$  and  $\hat{q}_z$  are solved by:

$$\begin{cases} q_z = q_x + \frac{2}{\beta}(\rho - q_x)^2 \Psi'_{\text{out}}(q_x), & (72a) \\ \hat{q}_z = \frac{q_x}{\rho(\rho - q_x)} & (72b) \end{cases}.$$

439 And finally, we reach that (with the notations of Conjecture 2.1)  $\alpha I_{\text{out}}(q_z) + I_{\text{int}}(q_x, q_z) = \alpha \Psi_{\text{out}}(q_x)$ .  
 440 Posing  $q = q_x, \hat{q} = \hat{q}_x$  finishes the proof.  $\square$

We turn now to proving the formula of Proposition D.18. The proof goes exactly as in the previous  
 sections of Section D, by considering instead of eq. (46) the interpolation problem:

$$\begin{cases} \left\{ Y_{t,\mu} \sim P_{\text{out}} \left( \cdot \mid \sqrt{\frac{1-t}{p}} [\Phi \mathbf{X}^*]_\mu + \sqrt{R_2(t, \epsilon)} V_\mu + \sqrt{\rho t - R_2(t, \epsilon) + 2s_n A_\mu^*} \right) \right\}_{\mu=1}^m & (73a) \\ \tilde{\mathbf{Y}}_t = (R_1(t, \epsilon))^{1/2} \star \mathbf{X}^* + \zeta, & (73b) \end{cases}$$

441 where  $V_\mu, A_\mu^* \stackrel{\text{i.i.d.}}{\sim} \mathcal{N}_\beta(0, 1)$ , and  $\zeta \sim \mathcal{N}_\beta(0, \mathbb{1}_n)$ . The prior distribution on  $\mathbf{X}^*$  is  $P_0$ . The rest of the  
 442 proof is then a trivial verbatim of Sections D.1 to D.5.

443 **E Proof of Proposition D.1**

444 In this section, we prove Proposition D.1: we start from Conjecture 2.1 and derive eq. (41). Note that  
 445 by (h2) we have  $\langle \lambda \rangle_\nu = \alpha \mathbb{E}_{\nu_B} [X] / \delta$ . We begin by recalling some sup-inf formulas, before turning  
 446 to the actual proof.

447 **E.1 Some sup-inf formulas**

448 We recall Corollary 8 of [9], stated here as a lemma:

449 **Lemma E.1** ([9]). *Let  $f : \mathbb{R}_+ \rightarrow \mathbb{R}$  be a  $\mathcal{C}^1$  convex, non-decreasing, Lipschitz function. Define*  
 450  *$\rho \equiv \|f'\|_\infty$ . Let  $g : [0, \rho] \rightarrow \mathbb{R}$  be a convex, non-decreasing, Lipschitz function. For  $(q_1, q_2) \in$*   
 451  *$\mathbb{R}_+ \times [0, \rho]$  we define  $\psi(q_1, q_2) \equiv f(q_1) + g(q_2) - q_1 q_2$ . Then:*

$$\sup_{q_1 \geq 0} \inf_{q_2 \in [0, \rho]} \psi(q_1, q_2) = \sup_{q_2 \in [0, \rho]} \inf_{q_1 \geq 0} \psi(q_1, q_2).$$

452 We can state a corollary for functions of two variables.

453 **Corollary E.2.** Let  $f : \mathbb{R}_+^2 \rightarrow \mathbb{R}$  be a  $C^1$  convex, Lipschitz function which is nondecreasing in each  
454 of its variables. Define  $\rho_1 \equiv \|\partial_1 f\|_\infty, \rho_2 \equiv \|\partial_2 f\|_\infty$ . Let  $g : [0, \rho_1] \rightarrow \mathbb{R}, g_2 : [0, \rho_2] \rightarrow \mathbb{R}$  be two  
455 convex, non-decreasing, Lipschitz functions. For  $(x_1, x_2, y_1, y_2) \in \mathbb{R}_+^2 \times [0, \rho_1] \times [0, \rho_2]$  we define  
456  $\psi(x_1, x_2, y_1, y_2) \equiv f(x_1, x_2) + g_1(y_1) + g_2(y_2) - x_1 y_1 - x_2 y_2$ . Then:

$$\sup_{x_1, x_2 \geq 0} \inf_{y_1, y_2 \in [0, \rho_1] \times [0, \rho_2]} \psi(x_1, x_2, y_1, y_2) = \sup_{y_1, y_2 \in [0, \rho_1] \times [0, \rho_2]} \inf_{x_1, x_2 \geq 0} \psi(x_1, x_2, y_1, y_2).$$

457 *Proof of Corollary E.2.* The proof is a verbatim of the proof of Corollary 8 in [9], using that at fixed  
458  $y, x \mapsto f(x, y)$  is  $\rho_1$ -Lipschitz, while at fixed  $x, y \mapsto f(x, y)$  is  $\rho_2$ -Lipschitz.  $\square$

## 459 E.2 Core of the proof

460 We now turn to the proof of Proposition D.1. We begin by simplifying the free entropy potential  
461 using the Gaussian prior. We start from Conjecture 2.1. Since  $P_0$  is Gaussian by (h1), we can easily  
462 simplify the prior term  $I_0$  as:

$$I_0(q_x) = \inf_{\hat{q}_x \geq 0} \left[ \frac{\beta \hat{q}_x (1 - q_x)}{2} - \frac{\beta}{2} \ln(1 + \hat{q}_x) \right] = \frac{\beta q_x}{2} + \frac{\beta}{2} \ln(1 - q_x).$$

463 We now turn to the term  $I_{\text{int}}(q_x, q_z)$ . We can write it as:

$$\begin{aligned} I_{\text{int}}(q_x, q_z) &= \inf_{\gamma_x, \gamma_z \geq 0} \left[ \frac{\beta}{2} (1 - q_x) \gamma_x + \frac{\alpha \beta}{2} (Q_z - q_z) \gamma_z - \frac{\beta}{2} \langle \ln(1 + \gamma_x + \lambda \gamma_z) \rangle_\nu \right] \quad (74) \\ &\quad - \frac{\beta}{2} \ln(1 - q_x) - \frac{\beta q_x}{2} - \frac{\alpha \beta}{2} \ln(Q_z - q_z) - \frac{\alpha \beta q_z}{2 Q_z}. \end{aligned}$$

464 So we have, using Corollary E.2, that if  $f \equiv \sup_{q_x \in [0, 1]} \sup_{q_z \in [0, Q_z]} [I_0(q_x) + \alpha I_{\text{out}}(q_z) +$   
465  $I_{\text{int}}(q_x, q_z)]$  is the conjectured limit of the free entropy:

$$\begin{aligned} f &= \sup_{q_x \in [0, 1]} \sup_{q_z \in [0, Q_z]} \inf_{\gamma_x, \gamma_z \geq 0} \left[ \alpha I_{\text{out}}(q_z) + \frac{\beta}{2} (1 - q_x) \gamma_x + \frac{\alpha \beta}{2} (Q_z - q_z) \gamma_z \right. \\ &\quad \left. - \frac{\beta}{2} \langle \ln(1 + \gamma_x + \lambda \gamma_z) \rangle_\nu - \frac{\alpha \beta}{2} \ln(Q_z - q_z) - \frac{\alpha \beta q_z}{2 Q_z} \right], \\ &= \sup_{\gamma_x, \gamma_z \geq 0} \inf_{q_z \in [0, Q_z]} \inf_{q_x \in [0, 1]} \left[ \alpha I_{\text{out}}(q_z) + \frac{\beta}{2} (1 - q_x) \gamma_x + \frac{\alpha \beta}{2} (Q_z - q_z) \gamma_z \right. \\ &\quad \left. - \frac{\beta}{2} \langle \ln(1 + \gamma_x + \lambda \gamma_z) \rangle_\nu - \frac{\alpha \beta}{2} \ln(Q_z - q_z) - \frac{\alpha \beta q_z}{2 Q_z} \right]. \quad (75) \end{aligned}$$

466 The infimum on  $q_x$  is very easily solved, as we have  $\inf_{q_x \in [0, 1]} [-\beta q_x \gamma_x / 2] = -\beta \gamma_x / 2$ . Note that at  
467 fixed  $\gamma_z \geq 0$ , the variables  $\gamma_x, q_z$  are completely decoupled in eq. (75), so we have  $\sup_{\gamma_x} \inf_{q_z} =$   
468  $\inf_{q_z} \sup_{\gamma_x}$ . This yields:

$$\begin{aligned} f &= \sup_{\gamma_z \geq 0} \inf_{q_z \in [0, Q_z]} \sup_{\gamma_x \geq 0} \left[ \alpha I_{\text{out}}(q_z) + \frac{\alpha \beta}{2} (Q_z - q_z) \gamma_z \right. \\ &\quad \left. - \frac{\beta}{2} \langle \ln(1 + \gamma_x + \lambda \gamma_z) \rangle_\nu - \frac{\alpha \beta}{2} \ln(Q_z - q_z) - \frac{\alpha \beta q_z}{2 Q_z} \right], \\ &= \sup_{\gamma_z \geq 0} \inf_{q_z \in [0, Q_z]} \left[ \frac{\beta}{2} \left[ \alpha (Q_z - q_z) \gamma_z - \alpha \frac{q_z}{Q_z} - \langle \ln(1 + \lambda \gamma_z) \rangle_\nu - \alpha \ln(Q_z - q_z) \right] + \alpha I_{\text{out}}(q_z) \right]. \end{aligned}$$

469 Recall the form of  $I_{\text{out}}$  in Conjecture 2.1 and that  $\hat{Q}_z = 1/Q_z$ . Using the form of  $I_{\text{out}}$ , we have with  
470 the notations of Proposition D.1:

$$\begin{aligned} f &= \sup_{\gamma_z \geq 0} \inf_{q_z \in [0, Q_z]} \inf_{\hat{q}_z \geq 0} \left[ \frac{\beta}{2} \left[ \alpha (Q_z - q_z) \gamma_z - \alpha \frac{q_z}{Q_z} - \langle \ln(1 + \lambda \gamma_z) \rangle_\nu - \alpha \ln(Q_z - q_z) \right. \right. \\ &\quad \left. \left. - \alpha q_z \hat{q}_z - \alpha \ln(\hat{q}_z + 1/Q_z) + \alpha Q_z \hat{q}_z \right] + \alpha \Psi_{\text{out}}(\sqrt{Q_z^2 \hat{q}_z / (1 + Q_z \hat{q}_z)}) \right]. \end{aligned}$$

471 Again, we use that at fixed  $q_z$ , the variables  $\hat{q}_z, \gamma_z$  are decoupled. So using again Lemma E.1, we have  
 472 schematically  $\sup_{\gamma_z} \inf_{q_z} \inf_{\hat{q}_z} = \sup_{q_z} \inf_{\hat{q}_z} \inf_{\gamma_z} = \sup_{\hat{q}_z} \inf_{\gamma_z} \inf_{q_z}$ . We can then explicitly  
 473 solve the infimum on  $q_z$ , which yields:

$$f = \sup_{\hat{q}_z \geq 0} \inf_{\gamma_z \geq 0} \left[ \frac{\beta}{2} \left[ - \langle \ln(1 + \lambda \gamma_z) \rangle_\nu + \alpha \ln(1 + \gamma_z(Q_z - q(\hat{q}_z))) \right] + \alpha \Psi_{\text{out}}(q(\hat{q}_z)) \right],$$

474 with

$$q(\hat{q}_z) \equiv \frac{Q_z^2 \hat{q}_z}{1 + Q_z \hat{q}_z}. \quad (76)$$

475 Note that  $q$  is a strictly increasing smooth function of  $\hat{q}_z$ , with  $q(0) = 0$  and  $q(+\infty) = Q_z$ . So we  
 476 have:

$$f = \sup_{q \in [0, Q_z]} \inf_{\gamma_z \geq 0} \left[ \frac{\beta}{2} \left[ - \langle \ln(1 + \lambda \gamma_z) \rangle_\nu + \alpha \ln(1 + \gamma_z(Q_z - q)) \right] + \alpha \Psi_{\text{out}}(q) \right], \quad (77)$$

477 We then state a technical lemma:

478 **Lemma E.3.** *Under hypothesis (h2), one has for every  $q \in [0, Q_z]$ :*

$$\inf_{\gamma_z \geq 0} [\alpha \ln(1 + \gamma_z(Q_z - q)) - \langle \ln(1 + \lambda \gamma_z) \rangle_\nu] = \inf_{\hat{q} \geq 0} [\delta \hat{q}(Q_z - q) - \mathbb{E}_{\nu_B} \ln(1 + \hat{q}X)].$$

479 Using Lemma E.3 in eq. (77), and inverting the sup-inf by Lemma E.1 finishes the proof of Proposi-  
 480 tion D.1. In the remaining of the section we prove Lemma E.3

### 481 E.3 Proof of Lemma E.3

482 If  $q = Q_z$ , the equality is trivially satisfied, so let us assume  $0 \leq q < Q_z$ . Let us denote  $h(\gamma_z) \equiv$   
 483  $\alpha \ln(1 + \gamma_z(Q_z - q)) - \langle \ln(1 + \lambda \gamma_z) \rangle_\nu$ . Recall that  $Q_z = \mathbb{E}_{\nu_B}[X]/\delta$ . Since  $\alpha \geq 1 - \nu(\{0\})$  and  
 484  $q < Q_z$ , one easily checks that  $h$  is lower-bounded, so the infimum is always well-defined. We  
 485 introduce  $\mu$  the asymptotic measure of  $\Phi \Phi^\dagger/n$ , and we denote  $g_\mu(z) \equiv \langle (\lambda - z)^{-1} \rangle_\mu$  its Stieltjes  
 486 transform. For every function  $f$ , one has  $\langle f(\lambda) \rangle_\nu = \alpha \langle f(\lambda) \rangle_\mu + (1 - \alpha)f(0)$ . This allows to write:

$$h(\gamma_z) = \alpha \ln(1 + \gamma_z(Q_z - q)) - \alpha \langle \ln(1 + \lambda \gamma_z) \rangle_\mu.$$

487 We will use the following equation, valid for every  $\gamma_z \geq 0$  and any positively supported measure  $\mu$ :

$$\langle \ln(\gamma_z + \lambda) \rangle_\mu = \inf_{\tilde{\gamma}_z \geq 0} \left[ \gamma_z \tilde{\gamma}_z + \int_0^{\tilde{\gamma}_z} \mathcal{R}_\mu(-t) dt - \ln \tilde{\gamma}_z - 1 \right], \quad (78)$$

488 in which  $\mathcal{R}_\mu$  is the so-called “ $R$ -transform” of  $\mu$ , defined as  $\mathcal{R}_\mu(-x) \equiv g_\mu^{-1}(x) + 1/x$ . It is a classical  
 489 result of random matrix theory [16] that if  $\mu$  is positively supported,  $t \mapsto \mathcal{R}_\mu(-t)$  is well-defined  
 490 on  $\mathbb{R}_+$ . We finish the proof of Lemma E.3, before proving eq. (78). By a classical result of random  
 491 matrix theory [15], we know the  $R$ -transform of  $\mu$  as a function of  $\nu_B$ :

$$\mathcal{R}_\mu(-t) = \mathbb{E}_{\nu_B} \left[ \frac{X}{\delta + \alpha t X} \right]. \quad (79)$$

492 Combining eq. (78) and eq. (79), we reach:

$$\inf_{\gamma_z \geq 0} h(\gamma_z) = \inf_{\gamma_z \geq 0} \sup_{\tilde{\gamma}_z \geq 0} \left[ \alpha \ln(1 + \gamma_z(Q_z - q)) + \alpha - \alpha \frac{\tilde{\gamma}_z}{\gamma_z} + \alpha \ln \frac{\tilde{\gamma}_z}{\gamma_z} - \mathbb{E}_{\nu_B} \ln \left( 1 + \frac{\alpha}{\delta} X \tilde{\gamma}_z \right) \right].$$

493 Using Lemma E.1 to invert the inf-sup, we have:

$$\inf_{\gamma_z \geq 0} h(\gamma_z) = \inf_{\tilde{\gamma}_z \geq 0} \sup_{\gamma_z \geq 0} \left[ \alpha \ln(1 + \gamma_z(Q_z - q)) + \alpha - \alpha \frac{\tilde{\gamma}_z}{\gamma_z} + \alpha \ln \frac{\tilde{\gamma}_z}{\gamma_z} - \mathbb{E}_{\nu_B} \ln \left( 1 + \frac{\alpha}{\delta} X \tilde{\gamma}_z \right) \right].$$

494 The supremum on  $\gamma_z$  is now completely tractable, and we have:

$$\inf_{\gamma_z \geq 0} h(\gamma_z) = \inf_{\tilde{\gamma}_z \geq 0} \left[ \alpha(Q_z - q)\tilde{\gamma}_z - \mathbb{E}_{\nu_B} \ln \left( 1 + \frac{\alpha}{\delta} X \tilde{\gamma}_z \right) \right].$$

495 Doing the replacement  $\hat{q} \equiv \alpha \tilde{\gamma}_z / \delta$  yields Lemma E.3. We now prove eq. (78), which will finish the  
 496 proof. It follows from a classical result used in random matrix theory, see e.g. [8] for an application of  
 497 these calculations to spherical integrals. Recall that  $g_\mu$  is smooth and strictly increasing on  $(-\infty, 0)$ ,  
 498 as  $\mu$  is positively supported. It is easy to see by differentiation that the infimum in eq. (78) is attained  
 499 at  $\tilde{\gamma}_z = g_\mu(-\gamma_z)$ . We then use some manipulations:

$$\begin{aligned} \inf_{\tilde{\gamma}_z \geq 0} \left[ \gamma_z \tilde{\gamma}_z + \int_0^{\tilde{\gamma}_z} \mathcal{R}_\mu(-t) dt - \ln \tilde{\gamma}_z \right] &= \gamma_z g_\mu(-\gamma_z) + \int_0^{g_\mu(-\gamma_z)} \mathcal{R}_\mu(-t) dt - \ln g_\mu(-\gamma_z), \\ &= \gamma_z g_\mu(-\gamma_z) + \int_\epsilon^{g_\mu(-\gamma_z)} g_\mu^{-1}(t) dt - \ln \epsilon + \int_0^\epsilon \mathcal{R}_\mu(-t) dt, \end{aligned}$$

500 this equation being valid for all  $\epsilon > 0$  sufficiently small. By regularity of the  $R$ -transform around 0  
 501 [16],  $\int_0^\epsilon \mathcal{R}_\mu(-t) dt = \mathcal{O}_\epsilon(1)$ . Moreover, we can change variables in the other integral, and we reach:

$$\begin{aligned} \inf_{\tilde{\gamma}_z \geq 0} \left[ \gamma_z \tilde{\gamma}_z + \int_0^{\tilde{\gamma}_z} \mathcal{R}_\mu(-t) dt - \ln \tilde{\gamma}_z \right] &= \gamma_z g_\mu(-\gamma_z) + \int_{-g_\mu^{-1}(\epsilon)}^{\gamma_z} u g_\mu(-u) du - \ln \epsilon + \mathcal{O}_\epsilon(1), \\ &\stackrel{(a)}{=} -\ln \epsilon - \epsilon g_\mu^{-1}(\epsilon) + \int_{-g_\mu^{-1}(\epsilon)}^{\gamma_z} g_\mu(-u) du + \mathcal{O}_\epsilon(1), \\ &\stackrel{(b)}{=} 1 + \langle \ln(\lambda + \gamma_z) \rangle_\mu + \mathcal{O}_\epsilon(1), \end{aligned}$$

502 in which we used integration by parts in (a) and the definition of the Stieltjes transform in (b). Since  
 503  $\epsilon$  was taken arbitrarily small, taking the limit  $\epsilon \rightarrow 0$  ends the proof.

## 504 F Technical lemmas and definitions

### 505 F.1 Some definitions

506 Let  $\beta \in \{1, 2\}$ . We denote  $\mathbb{K} = \mathbb{R}$  if  $\beta = 1$  and  $\mathbb{K} = \mathbb{C}$  if  $\beta = 2$ .  $\mathcal{U}_\beta(n)$  denotes the orthogonal (re-  
 507 spectively unitary) group, and  $\mathcal{S}_\beta(\mathbb{R})$ ,  $\mathcal{S}_\beta^+(\mathbb{R})$  the space of *real* symmetric (resp. positive symmetric)  
 508 matrices of size  $\beta$ .  $\mathbb{1}_\beta$  is the identity matrix of size  $\beta$ . To improve clarity, we write  $\text{Tr}_\beta$  when taking  
 509 the trace of a matrix in the space  $\mathcal{S}_\beta(\mathbb{R})$ . The standard Gaussian measure is defined on  $\mathbb{K}$  as:

$$\mathcal{D}_\beta z \equiv \left( \frac{\beta}{2\pi} \right)^{\beta/2} \exp\left(-\frac{\beta}{2}|z|^2\right) dz. \quad (80)$$

We define three different types of products in  $\mathbb{K}$ , using the identification  $\mathbb{K} \simeq \mathbb{R}^\beta$ .

$$\begin{cases} zz' & \text{the usual product in } \mathbb{K}, \\ z \cdot z' \equiv \text{Re}[\bar{z}z'] & \text{the dot product in } \mathbb{R}^\beta. \end{cases} \quad (81a) \quad (81b)$$

510 For  $\beta = 1$ , and  $M, z \in \mathbb{R}$ , we also denote  $M \star z \equiv Mz$ . For  $\beta = 2$ , with  $z = x + iy \in \mathbb{C}$ , and  
 511  $M \in \mathcal{S}_2$  written as:

$$M \equiv a\mathbb{1}_2 + \begin{pmatrix} b & c \\ c & -b \end{pmatrix}, \quad (82)$$

512 we define  $M \star z$  as the matrix-vector product in  $\mathbb{R}^\beta$ :

$$M \star z \equiv M \begin{pmatrix} x \\ y \end{pmatrix} = az + (b + ic)\bar{z}. \quad (83)$$

513 Note that in the  $\beta = 1$  case, all three products are equivalent.

### 514 F.2 Conventions for derivatives

515 We often consider functions  $f : \mathbb{K} \rightarrow \mathbb{R}$ . The derivatives for such functions are defined in the usual  
 516 sense if  $\mathbb{K} = \mathbb{R}$ , while for  $\mathbb{K} = \mathbb{C}$  we set it in the ‘‘function of two variables’’ sense (with  $z = x + iy$ ):

$$f'(z) \equiv \partial_x f + i\partial_y f. \quad (84)$$



517 We will also define its Laplacian if  $\mathbb{K} = \mathbb{C}$  (if  $\mathbb{K} = \mathbb{R}$  then  $\Delta f(x) = f''(x)$ ):

$$\Delta f(z) \equiv \partial_x^2 f + \partial_y^2 f. \quad (85)$$

518 Importantly, this definition is different from the usual Wirtinger definition of a complex derivative,  
 519 because we do not consider holomorphic functions here, but merely differentiable real functions of  
 520 two variables. This definition satisfies the following chain rule formula, for  $h(x) \equiv f(g(x))$  and  
 521  $f : \mathbb{K} \rightarrow \mathbb{R}, g : \mathbb{R} \rightarrow \mathbb{K}$ :

$$h'(x) = g'(x) \cdot f'(g(x)). \quad (86)$$

522 As a particular case, we have if  $f(x) = x \cdot z$  that  $f'(x) = z$ . We then have the Stein lemma (or  
 523 Gaussian integration by parts), for any  $\mathcal{C}^2$  function  $f : \mathbb{K} \rightarrow \mathbb{R}$ :

$$\int \mathcal{D}_\beta z (z f(z)) = \frac{1}{\beta} \int \mathcal{D}_\beta z f'(z), \quad (87)$$

$$\int \mathcal{D}_\beta z (z \cdot f'(z)) = \frac{1}{\beta} \int \mathcal{D}_\beta z \Delta f(z). \quad (88)$$

### 524 F.3 Nishimori identity

525 We state here the Nishimori identity, a classical consequence of Bayes optimality.

526 **Proposition F.1** (Nishimori identity). *Let  $(X, Y)$  be random variables on a Polish space  $E$ . Let*  
 527  *$k \in \mathbb{N}^*$  and  $(X_1, \dots, X_k)$  i.i.d. random variables sampled from the conditional distribution  $\mathbb{P}(X|Y)$ .*  
 528 *We denote  $\langle \cdot \rangle_Y$  the average with respect to  $\mathbb{P}(X|Y)$ , and  $\mathbb{E}[\cdot]$  the average with respect to the joint*  
 529 *law of  $(X, Y)$ . Then, for all  $f : E^{k+1} \rightarrow \mathbb{K}$  continuous and bounded:*

$$\mathbb{E}[\langle f(Y, X_1, \dots, X_k) \rangle_Y] = \mathbb{E}[\langle (Y, X_1, \dots, X_{k-1}, X) \rangle_Y]. \quad (89)$$

530 *Proof of Proposition F.1.* The proposition arises as a trivial consequence of Bayes' formula:

$$\begin{aligned} \mathbb{E}[\langle f(Y, X_1, \dots, X_{k-1}, X) \rangle_Y] &= \mathbb{E}_Y \mathbb{E}_{X|Y}[\langle f(Y, X_1, \dots, X_{k-1}, X) \rangle_Y], \\ &= \mathbb{E}_Y[\langle f(Y, X_1, \dots, X_k) \rangle_Y]. \end{aligned}$$

531 □

### 532 F.4 Boundedness of an overlap fluctuation

533 **Lemma F.2** (Boundedness of an overlap fluctuation). *Under (H0), one can find a constant  $C > 0$*   
 534 *independent of  $n, t, \epsilon$  such that for any  $r \geq 0$ :*

$$\mathbb{E} \left\langle \left| \frac{1}{n} \sum_{\mu=1}^m u'_{Y_{t,\mu}}(S_{t,\mu})^\dagger u'_{Y_{t,\mu}}(s_{t,\mu}) - \beta^2 \delta r \right|^2 \right\rangle_{n,t,\epsilon} \leq 2\beta^4 \delta^2 r^2 + C. \quad (90)$$

535 *Proof of Lemma F.2.* We directly have:

$$\begin{aligned} \mathbb{E} \left\langle \left| \frac{1}{n} \sum_{\mu=1}^m u'_{Y_{t,\mu}}(S_{t,\mu})^\dagger u'_{Y_{t,\mu}}(s_{t,\mu}) - \beta^2 \delta r \right|^2 \right\rangle_{n,t,\epsilon} \\ \leq 2\beta^4 \delta^2 r^2 + 2\mathbb{E} \left\langle \left| \frac{1}{n} \sum_{\mu=1}^m u'_{Y_{t,\mu}}(S_{t,\mu})^\dagger u'_{Y_{t,\mu}}(s_{t,\mu}) \right|^2 \right\rangle_{n,t,\epsilon} \end{aligned}$$

536 We can bound  $|u'_{Y_{t,\mu}}(s)|$  for any  $s \in \mathbb{K}$  by using the formulation of the channel described in eq. (2),  
 537 which allows to formally write:

$$u'_{Y_{t,\mu}}(s) = \lim_{\Delta \downarrow 0} \frac{\int P_A(da) \partial_s \varphi_{\text{out}}(s, a) (Y_{t,\mu} - \varphi_{\text{out}}(s, a)) e^{-\frac{1}{2\Delta} (Y_{t,\mu} - \varphi_{\text{out}}(s, a))^2}}{\int P_A(da) e^{-\frac{1}{2\Delta} (Y_{t,\mu} - \varphi_{\text{out}}(s, a))^2}},$$

538 in which we used a Gaussian representation of the delta distribution. This amounts to add a small  
 539 Gaussian noise to the model of eq. (2), and effectively write it as:

$$Y_\mu \sim \varphi_{\text{out}}(S_\mu, A_\mu) + \sqrt{\Delta} Z'_\mu, \quad (91)$$

540 with  $Z'_\mu \stackrel{\text{i.i.d.}}{\sim} \mathcal{N}(0, 1)$ , and then take the  $\Delta \rightarrow 0$  limit. We have  $|Y_{t,\mu}| \leq \|\varphi_{\text{out}}\|_\infty + \sqrt{\Delta}|Z'_\mu|$ , and  
 541 thus taking  $\Delta \rightarrow 0$  we reach:

$$|u'_{Y_{t,\mu}}(s)| \leq 2 \|\varphi_{\text{out}}\|_\infty \|\partial_s \varphi_{\text{out}}\|_\infty.$$

542 The right-hand side of the last inequality is bounded by hypothesis (H0), and in the end, we have:

$$\mathbb{E} \left\langle \left| \frac{1}{n} \sum_{\mu=1}^m u'_{Y_{t,\mu}}(S_{t,\mu})^\dagger u'_{Y_{t,\mu}}(s_{t,\mu}) - \beta^2 \delta r \right|^2 \right\rangle_{n,t,\epsilon} \leq 2\beta^4 \delta^2 r^2 + 2^5 \|\varphi_{\text{out}}\|_\infty^4 \|\partial_s \varphi_{\text{out}}\|_\infty^4,$$

543 which ends the proof. □

## 544 References

- 545 [1] Antoine Baker, Benjamin Aubin, Florent Krzakala, and Lenka Zdeborová. Tramp: Composi-  
 546 tional inference with tree approximate message passing. *arXiv preprint arXiv:2004.01571*,  
 547 2020.
- 548 [2] Takashi Takahashi and Yoshiyuki Kabashima. Macroscopic analysis of vector approximate  
 549 message passing in a model mismatch setting. *arXiv preprint arXiv:2001.02824*, 2020.
- 550 [3] Sundeep Rangan, Philip Schniter, and Alyson K Fletcher. Vector approximate message passing.  
 551 In *2017 IEEE International Symposium on Information Theory (ISIT)*, pages 1588–1592. IEEE,  
 552 2017.
- 553 [4] Philip Schniter, Sundeep Rangan, and Alyson K Fletcher. Vector approximate message passing  
 554 for the generalized linear model. In *2016 50th Asilomar Conference on Signals, Systems and*  
 555 *Computers*, pages 1525–1529. IEEE, 2016.
- 556 [5] Marc Mézard, Giorgio Parisi, and Miguel Virasoro. *Spin glass theory and beyond: An Intro-*  
 557 *duction to the Replica Method and Its Applications*, volume 9. World Scientific Publishing  
 558 Company, 1987.
- 559 [6] Lenka Zdeborová and Florent Krzakala. Statistical physics of inference: Thresholds and  
 560 algorithms. *Advances in Physics*, 65(5):453–552, 2016.
- 561 [7] David S Dean and Satya N Majumdar. Large deviations of extreme eigenvalues of random  
 562 matrices. *Physical review letters*, 97(16):160201, 2006.
- 563 [8] Alice Guionnet and M Maida. A Fourier view on the R-transform and related asymptotics of  
 564 spherical integrals. *Journal of functional analysis*, 222(2):435–490, 2005.
- 565 [9] Jean Barbier, Florent Krzakala, Nicolas Macris, Léo Miolane, and Lenka Zdeborová. Optimal  
 566 errors and phase transitions in high-dimensional generalized linear models. *Proceedings of the*  
 567 *National Academy of Sciences*, 116(12):5451–5460, 2019.
- 568 [10] Florent Krzakala, Marc Mézard, Francois Sausset, Yifan Sun, and Lenka Zdeborová. Probabilis-  
 569 tic reconstruction in compressed sensing: algorithms, phase diagrams, and threshold achieving  
 570 matrices. *Journal of Statistical Mechanics: Theory and Experiment*, 2012(08):P08009, 2012.
- 571 [11] Benjamin Aubin, Antoine Maillard, Florent Krzakala, Nicolas Macris, Lenka Zdeborová, et al.  
 572 The committee machine: Computational to statistical gaps in learning a two-layers neural  
 573 network. In *Advances in Neural Information Processing Systems*, pages 3223–3234, 2018.
- 574 [12] Jean Barbier. Overlap matrix concentration in optimal bayesian inference. *arXiv preprint*  
 575 *arXiv:1904.02808*, 2019.
- 576 [13] Stéphane Boucheron, Gábor Lugosi, and Pascal Massart. *Concentration inequalities: A*  
 577 *nonasymptotic theory of independence*. Oxford university press, 2013.
- 578 [14] D. Guo, S. Shamai, and S. Verdú. Mutual information and minimum mean-square error in  
 579 gaussian channels. *IEEE Transactions on Information Theory*, 51(4):1261–1282, Apr 2005.  
 580 ISSN 0018-9448. doi: 10.1109/tit.2005.844072.

- 581 [15] Vladimir Alexandrovich Marchenko and Leonid Andreevich Pastur. Distribution of eigenvalues  
582 for some sets of random matrices. *Matematicheskii Sbornik*, 114(4):507–536, 1967.
- 583 [16] Antonia M Tulino and Sergio Verdú. Random matrix theory and wireless communications.  
584 *Foundations and Trends® in Communications and Information Theory*, 1(1):1–182, 2004.
